**Ancient viral genomes reveal introduction of HBV and B19V into Mexico  
during the transatlantic slave trade.**

Axel A. Guzmán-Solís<sup>1,2\*</sup>, Daniel Blanco-Melo<sup>3\*‡</sup>, Viridiana Villa-Islas<sup>1</sup>, Miriam J. Bravo-López<sup>1</sup>, Marcela Sandoval-Velasco<sup>4</sup>, Julie K. Wesp<sup>5</sup>, Jorge A. Gómez-Valdés<sup>6</sup>, María de la Luz Moreno-Cabrera<sup>7</sup>, Alejandro Meraz-Moreno<sup>7</sup>, Gabriela Solís-Pichardo<sup>8</sup>, Peter SchAAF<sup>9</sup>, Benjamin R. tenOever<sup>3</sup> & María C. Ávila-Arcos<sup>1‡</sup>.

1. International Laboratory for Human Genome Research, Universidad Nacional Autónoma de México (México); 2. Aaron Diamond AIDS Research Center, Columbia University Vagelos College of Physicians and Surgeons (NY, USA); 3. Department of Microbiology, Icahn School of Medicine at Mount Sinai (NY, USA); 4. Section for Evolutionary Genomics, The Globe Institute, Faculty of Health, University of Copenhagen (Denmark); 5. Department of Sociology and Anthropology, North Carolina State University (USA); 6. Escuela Nacional de Antropología e Historia (México); 7. Instituto Nacional de Antropología e Historia (México); 8. Laboratorio Universitario de Geoquímica Isotópica (LUGIS), Instituto de Geología, Universidad Nacional Autónoma de México (México); 9. LUGIS, Instituto de Geofísica, Universidad Nacional Autónoma de México (México).

\* These authors contributed equally to this work. ‡ Correspondence: [daniel.blancomelo@mssm.edu](mailto:daniel.blancomelo@mssm.edu) (D.B-M.), [mavila@iigh.unam.mx](mailto:mavila@iigh.unam.mx) (M.C.A-A.).

25 **ABSTRACT**

26 After the European colonization of the Americas there was a dramatic population  
27 collapse of the Indigenous inhabitants caused in part by the introduction of new  
28 pathogens. Although there is much speculation on the etiology of the Colonial  
29 epidemics, direct evidence for the presence of specific viruses during the Colonial  
30 era is lacking. To uncover the diversity of viral pathogens during this period, we  
31 designed an enrichment assay targeting ancient DNA (aDNA) from viruses of clinical  
32 importance and applied it on DNA extracts from individuals found in a Colonial  
33 hospital and a Colonial chapel (16<sup>th</sup> c. – 18<sup>th</sup> c.) where records suggest victims of  
34 epidemics were buried during important outbreaks in Mexico City. This allowed us  
35 to reconstruct three ancient human parvovirus B19 genomes, and one ancient  
36 human hepatitis B virus genome from distinct individuals. The viral genomes are  
37 similar to African strains, consistent with the inferred morphological and genetic  
38 African ancestry of the hosts as well as with the isotopic analysis of the human  
39 remains, suggesting an origin on the African continent. This study provides direct  
40 molecular evidence of ancient viruses being transported to the Americas during the  
41 transatlantic slave trade and their subsequent introduction to New Spain. Altogether,  
42 our observations enrich the discussion about the etiology of infectious diseases  
43 during the Colonial period in Mexico.

44

45

46

47

48

## 49 INTRODUCTION

50 European colonization in the Americas resulted in a frequent genetic exchange  
51 mainly between Native American populations, Europeans, and Africans (Aguirre-  
52 Beltrán, 2005; Rotimi et al., 2016; Salas et al., 2004). Along with human migrations,  
53 numerous new species were introduced to the Americas including bacterial and viral  
54 pathogens, which played a major role in the dramatic population collapse that  
55 afflicted the immunologically-naïve Indigenous inhabitants (Acuña-Soto et al., 2004;  
56 Lindo et al., 2016). Among these pathogens, viral diseases, such as smallpox,  
57 measles and mumps have been proposed to be responsible for many of the  
58 devastating epidemics during the Colonial period (Acuña-Soto et al., 2004).  
59 Remarkably, the pathogen(s) responsible for the deadliest epidemics reported in  
60 New Spain (the Spanish viceroyalty that corresponds to Mexico, Central America,  
61 and the current US southwest states) remains unknown and is thought to have  
62 caused millions of deaths during the 16<sup>th</sup> century<sup>4</sup>. Indigenous populations were  
63 drastically affected by these mysterious epidemics, generically referred to as  
64 *Cocoliztli* (“pest” in Nahuatl)<sup>6</sup>, followed by Africans and to a lesser extent European  
65 people (Acuña-Soto et al., 2004; Malvido & Viesca, 1982; Somolinos d’Árdois, 1982).  
66 Symptoms of the 1576 *Cocoliztli* epidemic were described in autopsy reports of  
67 victims treated at the “Hospital Real de San José de los Naturales” (HSJN) (Malvido  
68 & Viesca, 1982; Wesp, 2017), the first hospital in Mexico dedicated specifically to  
69 treat the Indigenous population (Malvido & Viesca, 1982; Wesp, 2017) (Figure 1a-  
70 b). The symptoms described included high fever, severe headache, neurological  
71 disorders, internal and external bleeding, hepatitis and intense jaundice (Acuña-Soto  
72 et al., 2004; Malvido & Viesca, 1982; Somolinos d’Árdois, 1982). This has led some

73 scholars to postulate that the etiological agent of the *Cocoliztli* epidemic was a  
74 hemorrhagic fever virus (Acuña-Soto et al., 2004; Marr & Kiracofe, 2000), although  
75 others have suggested that the symptoms could be explained by bacterial infections  
76 (Malvido & Viesca, 1982; Vågane et al., 2018).

77

78 The study of ancient viral genomes has revealed important insights into the evolution  
79 of specific viral families (Barquera et al., 2020; Duggan et al., 2016; Dux et al., 2020;  
80 Kahila Bar-Gal et al., 2012; Krause-Kyora et al., 2018, p.; Mühlemann, Jones, et al.,  
81 2018, 2018; Mühlemann, Margaryan, et al., 2018; Neukamm et al., 2020; Pajer et  
82 al., 2017; Patterson Ross et al., 2018; Xiao et al., 2013), as well as their interaction  
83 with human populations (Spyrou et al., 2019). To explore the presence of viral  
84 pathogens in circulation during epidemic periods in New Spain, we leveraged the  
85 vast historical and archeological information available for the Colonial HSJN. These  
86 include the skeletal remains of over 600 individuals recovered from mass burials  
87 associated with the hospital's architectural remnants (Figure 1b). Many of these  
88 remains were retrieved from burial contexts suggestive of an urgent and  
89 simultaneous disposal of the bodies, as in the case of an epidemic (Meza, 2013;  
90 Wesp, 2017). Prior bioarcheological research has shown that the remains of a  
91 number of individuals in the HSJN collection displayed dental modifications and/or  
92 morphological indicators typical of African ancestry (Meza, 2013), consistent with  
93 historical and archeological research that documents the presence of a large number  
94 of both free and enslaved Africans and their descendants in Colonial Mexico  
95 (Aguirre-Beltrán, 2005). Indeed a recent paleogenomics study reported a Sub-  
96 Saharan African origin of three individuals from this collection (Barquera et al., 2020).

97

98 Here we describe the recovery and characterization of viral pathogens that circulated  
99 in New Spain during Colonial times, using ancient DNA (aDNA) techniques  
100 (Supplementary Figure 1). For this work, we sampled skeletal human remains  
101 recovered from the HSJN where archeological context suggest victims of epidemics  
102 were buried (Meza, 2013) and from “La Concepcion” chapel, one of the first catholic  
103 conversion centers in New Spain (Moreno-Cabrera et al., 2015) (Figure 1a). We  
104 report the reconstruction of ancient hepatitis B virus (HBV) and human parvovirus  
105 B19 (B19V) genomes recovered from these remains. Our findings provide a direct  
106 molecular evidence of human viral pathogens of African origin being introduced to  
107 New Spain during the transatlantic slave trade.

108

## 109 **RESULTS**

110 We sampled the skeletal remains from two archeological sites, a Colonial Hospital  
111 and a Colonial chapel in Mexico City (Figure 1a-b). For the HSJN, 21 dental samples  
112 (premolar and molar teeth) were selected based on previous morphometric analyses  
113 and dental modifications that suggested an African ancestry (Hernández-Lopez &  
114 Negrete, 2012; Karam-Tapia, 2012; Meza, 2013; Ruíz-Albarrán, 2012). The African  
115 presence in the Indigenous Hospital might reflect an urgent response to an epidemic  
116 outbreak, since hospitals treated patients regardless of the origin of the affected  
117 individuals during serious public health crises (Meza, 2013). Dental samples of five  
118 additional individuals were selected (based on their conservation state) from “La  
119 Concepción” chapel (COY), which is located 10 km south of the HSJN in Coyoacán,  
120 a Pre-Hispanic Indigenous neighborhood that became the first Spanish settlement

121 in Mexico City after the fall of Tenochtitlan (Moreno-Cabrera et al., 2015). Following  
122 strict aDNA protocols, we processed these dental samples to isolate aDNA for next-  
123 generation sequencing (NGS) (Supplementary Figure 1, Methods). Teeth roots  
124 (which are vascularized) can be a good source of pathogen DNA (Key et al., 2017),  
125 especially in the case of viruses that are widespread in the bloodstream during  
126 systemic infection. Accordingly, a number of previous studies have successfully  
127 recovered ancient viral DNA from teeth roots (Barquera et al., 2020; Krause-Kyora  
128 et al., 2018; Mühlemann, Jones, et al., 2018; Mühlemann, Margaryan, et al.,  
129 2018) (Mühlemann et al., 2020).

130

131 Metagenomic analysis with MALT (Vågane et al., 2018) (Methods) on the NGS data  
132 using the Viral NCBI RefSeq database as a reference (Pruitt et al., 2007), revealed  
133 seventeen samples contained at least one normalized hit to viral DNA, particularly  
134 similar to *Hepadnaviridae*, *Herpesviridae*, *Parvoviridae* and *Poxviridae* (Figure 1c,  
135 Supplementary Figure 2a, Methods). These viral hits revealed the potential to  
136 recover ancient viral genomes from these samples. We selected twelve samples for  
137 further screening (Figure 1c, Supplementary Figure 2b) based on the DNA  
138 concentration of the NGS library and the quality of the hits to a clinically important  
139 virus (HBV, B19V, Papillomavirus, Smallpox). To isolate and enrich the viral DNA  
140 fraction in the sequencing libraries, biotinylated single-stranded RNA probes  
141 designed to capture sequences from diverse human viral pathogens were  
142 synthesized (Supplementary Table 1). The selection of the viruses included in the  
143 capture design considered the following criteria: 1) DNA viruses previously retrieved  
144 from archeological human remains (i.e. Hepatitis B virus, Human Parvovirus B19,

145 Variola Virus), 2) representative viruses from families capable of integrating into the  
146 human genome (i.e. *Herpesviridae*, *Papillomaviridae*, *Polyomaviridae*, *Circoviridae*)  
147 or 3) RNA viruses with a DNA intermediate (i.e. *Retroviridae*). Additionally, a virus-  
148 negative aDNA library, which showed no hits to any viral family included in the  
149 capture assay (except for a frequent *Poxviridae*-like region identified as an Alu  
150 repeat (Tithi et al., 2018)), was captured and sequenced as a negative control  
151 (HSJN177) to estimate the efficiency of our capture assay. Four post-capture  
152 libraries had a ~100-fold increase of HBV-like hits or a ~50-200-fold increase of  
153 B19V-like hits (Figure 1c, Supplementary Table 2) compared to their corresponding  
154 pre-capture libraries (Methods). In contrast, the captured negative control  
155 (HSJN177) presented a negligible enrichment of these viral hits (Figure 1c,  
156 Supplementary Table 2).

157

158 We verified the authenticity of the viral sequences by querying the mapped reads  
159 against the non-redundant (nr) NCBI database using megaBLAST(Altschul et al.,  
160 1990). We only retained reads for which the top hit was to either B19V or HBV,  
161 respectively (Supplementary Table 3). 1 To confirm the ancient origin of these viral  
162 reads, we evaluated the misincorporation damage patterns using the program  
163 mapDamage 2.0 (Jónsson et al., 2013), which revealed an accumulation of C to T  
164 mutations towards their 5' terminal site with an almost symmetrical G to A pattern on  
165 the 3' end (Figure 2a, Supplementary Figure 3a), as expected for aDNA (Briggs et  
166 al., 2007). Three ancient B19V genomes were reconstructed (Figure 2b,  
167 Supplementary Table 3) with sequence coverages between 92.37% and 99.1%, and  
168 average depths of 2.98-15.36X along their single stranded DNA (ssDNA) coding

169 region, which excludes the double stranded DNA (dsDNA) hairpin regions at each  
170 end of the genome (Luo & Qiu, 2015). These dsDNA inverse terminal repeats (ITRs)  
171 displayed considerably higher depth values (<218X) compared to the coding region  
172 consistent with the better *post-mortem* preservation of dsDNA compared to ssDNA  
173 (Lindahl, 1993) (Figure 2b). In addition, we reconstructed one ancient HBV genome  
174 (Figure 2c, Supplementary Table 3) at 30.8X average depth and with a sequence  
175 coverage of 89.9%, including its ssDNA region at a reduced depth (<10X). This  
176 genome shows a 6 nucleotide (nt) insertion in the core gene, which is characteristic  
177 of the genotype A (Kramvis, 2014). Further phylogenetic analyses (Methods)  
178 revealed that the Colonial HBV genome clustered with modern sequences  
179 corresponding to sub-genotype A4 (previously named A6) (Pourkarim et al., 2014)  
180 (Figure 3a, Supplementary Figure 4). The Genotype A (HBV/GtA) has a broad  
181 diversity in Africa reflecting its long history in this continent (Kostaki et al., 2018;  
182 Kramvis, 2014), while the sub-genotype A4 has been recovered uniquely from  
183 African individuals in Belgium (Pourkarim et al., 2010) and has never been found in  
184 the Americas. Regarding the three Colonial B19V genomes from individuals  
185 HSJN240, COYC4 and HSJNC81, these were phylogenetically closer to modern  
186 B19V sequences belonging to genotype 3 (Figure 3b, Supplementary Figure 5a-b).  
187 This B19V genotype is divided into two sub-genotypes: 3a that is mostly found in  
188 Africa, and 3b, which is proposed to have spread outside Africa in the last decades  
189 (Hübschen et al., 2009). The viral sequences from the individuals HSJN240 and  
190 COYC4 are similar to sub-genotype 3b genomes sampled from immigrants  
191 (Morocco, Egypt and Turkey) in Germany (Schneider et al., 2008) (Figure 3b,  
192 Supplementary Figure 5a-b); while the sequence of the individual HSJNC81 is more



193 similar to a divergent sub-genotype 3a strain (Figure 3b, Supplementary Figure 5a-  
194 b) retrieved from a child with severe anemia born in France (Nguyen et al., 1999).  
195 These observations support the African origin of the reconstructed colonial viral  
196 genomes.

197

198 In order to infer the temporal dynamics between our samples and the rest of the viral  
199 diversity, we first estimated if the phylogenetic relationships among B19V or HBV  
200 genomes had a temporal structure. Similarly to previous studies (Krause-Kyora et  
201 al., 2018), we found little or no temporal structure for this HBV phylogeny containing  
202 all genotypes ( $R^2=0.1351$ ; correlation coefficient=0.3676) (Supplementary Figure  
203 6a-c). The complex evolution of HBV may not be prone to an appropriate genetic  
204 dating since multiple recombination and cross-species transmission (Human-Ape)  
205 events (Krause-Kyora et al., 2018) occurred throughout its evolution. Since the entire  
206 Genotype A has been identified as a recombinant genotype before (Mühlemann,  
207 Jones, et al., 2018) we analyzed it independently and identified a stronger temporal  
208 signal within this genotype ( $R^2=0.722$ ; correlation coefficient=0.8498)  
209 (Supplementary Figure 6d-f). In the case of B19V we identified a temporal structure  
210 when including all three genotypes ( $R^2=0.3837$ ; correlation coefficient=0.6194)  
211 (Supplementary Figure 7a-c), in agreement with previous studies (Mühlemann,  
212 Margaryan, et al., 2018). Furthermore, we corroborated this temporal structure was  
213 not an artifact by a set of tip-dated randomized analyses (Rieux & Balloux, 2016),  
214 where none of clock rate 95% highest posterior density (HPD) intervals overlapped  
215 with the correctly dated dataset (Supplementary Figure 8).

216 With these results we then performed a dated coalescent phylogenetic analysis. We  
217 inferred a median substitution rate for B19V of  $1.03 \times 10^{-5}$  (95% HPD:  $8.66 \times 10^{-6}$ -  
218  $1.21 \times 10^{-5}$ ) s/s/y under a strict clock and a constant population prior and a substitution  
219 rate of  $2.62 \times 10^{-5}$  (95% HPD:  $1.50 \times 10^{-5}$ - $3.98 \times 10^{-5}$ ) s/s/y under a relaxed log normal  
220 clock and a constant population prior. The divergence times from the most recent  
221 common ancestor of genotypes 1, 2 and 3 under a strict clock were 7.19 (95% HPD:  
222 6.98-7.46), 2.11 (95% HPD: 1.83-2.51), and 3.64 (95% HPD: 3.04-4.33) ka,  
223 respectively. The inferred substitution rates and divergence times from the most  
224 recent common ancestor for genotypes 1 and 2 were similar to previous estimations  
225 (Mühlemann, Margaryan, et al., 2018) that included much older sequences, while  
226 the divergence of genotype 3 was subtly older since no other ancient genotype 3  
227 had been reported previously.

228

229 Next, we used the *de novo* generated sequence data to determine the mitochondrial  
230 haplogroup of the hosts, as well as their autosomal genetic ancestry using the 1000  
231 Genomes Project (1000 Genomes Project Consortium et al., 2015) as a reference  
232 panel (Figure 4a, Supplementary Table 4). The nuclear genetic ancestry analysis  
233 showed that all three HSJN individuals, from which the reconstructed viral genomes  
234 were isolated, fall within African genetic variation in a Principal Component Analysis  
235 plot (Figure 4a), while their mitochondrial aDNA belong to the L haplogroup, which  
236 has high frequency in African populations (Supplementary Table 4, Supplementary  
237 Figure 3b). Additionally, we performed  $^{87}\text{Sr}/^{86}\text{Sr}$  isotopic analysis on two of the HSJN  
238 individuals using teeth enamel as well as phalange (HSJN240) or parietal bone  
239 (HSJNC81) to provide insights on the places of birth (adult enamel) and where the

240 last years of life were spent (phalange/parietal). The  $^{87}\text{Sr}/^{86}\text{Sr}$  ratios measured on  
241 the enamel of the individual HSJNC81 (0.711098) and HSJN240 (0.711109) are similar  
242 to average  $^{87}\text{Sr}/^{86}\text{Sr}$  ratios found in soils and rocks from West Africa (average of  
243 0.71044, Supplementary Figure 9, Supplementary Tables 6 and 7), as well as to  
244  $^{87}\text{Sr}/^{86}\text{Sr}$  ratios described in first generation Africans in the Americas (Barquera et  
245 al., 2020; Bastos et al., 2016; Fricke et al., 2020; T. D. Price et al., 2012; Schroeder  
246 et al., 2009). In contrast, the  $^{87}\text{Sr}/^{86}\text{Sr}$  ratios on the parietal and phalange bones from  
247 the HSJNC81 (0.70672) and HSJN240 (0.70755), show lower values similar to those  
248 observed in the Trans Mexican Volcanic Belt where the Mexico City Valley is located  
249 (0.70420 - 0.70550, Supplementary Figure 9, Supplementary Tables 6 and 7).  
250 Moreover, radiocarbon dating of HSJN240 (1442-1608 CE, years calibrated for  $1\sigma$ )  
251 and HSJN194 (1472-1625 CE, years calibrated for  $1\sigma$ ) (Supplementary Table 4,  
252 Supplementary Figure 10) indicates that these individuals arrived during the first  
253 decades of the Colonial period, when the number of enslaved individuals arriving  
254 from Africa was particularly high (Aguirre-Beltrán, 2005). Strikingly, Colonial  
255 individual COYC4, who was also infected with an African B19V strain, clusters with  
256 present-day Mexicans and Peruvians from the 1000 Genomes Project (Figure 4a).  
257 An ADMIXTURE (Alexander & Lange, 2011) analysis with these data confirmed a  
258 predominant Native American and African genetic component (Figure 4b), as  
259 expected for a post-contact individual. The B19V ancient genome from the individual  
260 COYC4 is the first genotype 3 genome obtained from a non-African individual and  
261 suggests that following the introduction from Africa, the virus (B19V) spread and  
262 infected people of different ancestries during Colonial times.

263

## 264 **DISCUSSION**

265 In this study we reconstructed one HBV and three B19V ancient genomes from four  
266 different individuals using NGS, metagenomics and in-solution targeted enrichment  
267 methods (Figure 2b, c, Supplementary Figure 1). Several lines of evidence support  
268 the ancient nature of these viral sequences, in contrast to environmental  
269 contamination or a capture artifact. First, our negative control was not enriched for  
270 B19V or HBV hits in our capture sequencing (Figure 1c). For those samples that  
271 showed an enrichment in viral sequences after capture, the reads covered the  
272 reference genomes almost in their entirety and displayed deamination patterns at  
273 the terminal ends of the reads, as expected for aDNA (Figure 2a). Moreover, it is  
274 important to notice that B19V and HBV are blood-borne human pathogens that are  
275 not present in soil or the environment, and that DNA from these viruses had never  
276 been extracted before in the aDNA facilities used for this study.

277

278 We also described an unusual coverage pattern on the B19V genome, where the  
279 dsDNA hairpins at its terminal sites are highly covered reflecting a better stability of  
280 these regions over time (Figure 2b). Similarly, the partially circular dsDNA genome  
281 from HBV was poorly covered at the ssDNA region (Figure 2c), as found in three  
282 previously reported ancient HBV genomes (Krause-Kyora et al., 2018)  
283 (Supplementary Discussion 1). The variable read coverage in both viruses argues  
284 against an integration event of these viruses, which would result in a uniform dsDNA  
285 coverage; further analyses are needed to determine if the aDNA retrieved in this and  
286 other studies comes from systemic circulating virions or from systemic cell-free DNA

287 intermediates (Cheng et al., 2019) produced after viral replication in the bone marrow  
288 or liver, for B19V and HBV, respectively (Broliden et al., 2006; Yuen et al., 2018).

289

290 The ancient B19V genomes were assigned to genotype 3. This genotype is the most  
291 prevalent in West Africa (Ghana: 100%, n=11; Burkina Faso: 100%, n=5) (Candotti  
292 et al., 2004; Hübschen et al., 2009; Rinckel et al., 2009) and a potential African origin  
293 has been suggested (Candotti et al., 2004). It has also been sporadically found  
294 outside Africa (Jain et al., 2015)(Candotti et al., 2004; Rinckel et al., 2009) in  
295 countries historically tied to this continent, like Brazil (50%, n=12) (Freitas et al.,  
296 2008; Sanabani et al., 2006), India (15.4%, n=13) (Jain et al., 2015), France (11.4%,  
297 n=79) (Nguyen et al., 1999; Servant et al., 2002), and USA (0.85%, n=117) (Rinckel  
298 et al., 2009) as well as in immigrants from Morocco, Egypt, and Turkey in Germany  
299 (6.7%, n=59) (Schneider et al., 2008). Two other genotypes, 1 and 2 exist for this  
300 virus. Genotype 1 is the most common and is found worldwide, while the almost  
301 extinct genotype 2 is mainly found in elderly people from Northern Europe (Pyöriä et  
302 al., 2017). Ancient genomes from genotypes 1 and 2 have been recovered from  
303 Eurasian samples, including a genotype 2 B19V genome from a 10<sup>th</sup> century Viking  
304 burial in Greenland (Mühlemann, Margaryan, et al., 2018). <sup>87</sup>Sr/<sup>86</sup>Sr isotopes on  
305 individuals from such burial revealed they were immigrants from Iceland  
306 (Mühlemann, Margaryan, et al., 2018), suggesting an introduction of the genotype 2  
307 to North America during Viking explorations of Greenland.

308

309 While serological evidence indicates that B19V currently circulates in Mexico, only  
310 the presence of genotype 1 has been formally described using molecular analyses

311 (Valencia Pacheco et al., 2017). Taken together, our results are consistent with an  
312 introduction of the genotype 3 to New Spain as a consequence of the transatlantic  
313 slave trade imposed by the European colonization. This hypothesis is supported by  
314 the  $^{87}\text{Sr}/^{86}\text{Sr}$  isotopic analysis, which gives evidence that the individuals from the  
315 HSJN with B19V (HSJN240, HSJNC81) were born in West Africa and spent their  
316 last years of life in New Spain (Supplementary Figure 9). Furthermore, the  
317 radiocarbon ages of individuals HSJN240, HSJN194 (Supplementary Figure 10)  
318 support this notion as they correspond to the Early Colonial period, during which the  
319 number of enslaved Africans arriving was higher compared to later periods (Aguirre-  
320 Beltrán, 2005). Remarkably, a B19V genome belonging to the genotype 3 was  
321 recovered from an admixed individual (COYC4) (Figure 4b) with a predominant  
322 Indigenous ancestry as well as some African. COY4 was excavated in an  
323 independent archeological site 10 Km south of the HSJN (Figure 1a), supporting the  
324 notion that viral transmissions between African individuals and people of different  
325 ancestries occurred during the Colonial period in Mexico City.

326

327 The genotype A from HBV is highly diverse in Africa, reflecting its long evolutionary  
328 history, and likely originated somewhere between Africa, Middle East and Central  
329 Asia (Kostaki et al., 2018). The introduction of the genotype A from Africa to the  
330 Americas has been proposed based on phylogenetic analysis of modern strains from  
331 Brazil (Freitas et al., 2008; Kostaki et al., 2018) and Mexico (Roman et al., 2010),  
332 and more precisely to the sub-genotype A1 using sequences from Martinique  
333 (Brichler et al., 2013), Venezuela (Quintero et al., 2002), Haiti (Andernach et al.,  
334 2009), and Colombia (Alvarado-Mora et al., 2012). Recently, a similar introduction

335 pattern was proposed for the quasi genotype A3 based on an ancient HBV genome  
336 recovered from an ancient African individual sampled in Mexico (Barquera et al.,  
337 2020). The origin of the sub-genotype 4 is controversial with an apparent African  
338 origin based on sequences recovered from African individuals in Europe (Pourkarim  
339 et al., 2010). The Colonial ancient HBV genome reconstructed in our work is  
340 assigned to genotype A4 (Figure 3a, Supplementary Figure 4), which represents the  
341 first report of this sub-genotype in the Americas and further supports its African  
342 origin. The introduction of the pathogens from Africa to the Americas has been  
343 proposed for other human-infecting viruses such as smallpox (Mandujano-Sánchez  
344 et al., 1982; Somolinos d'Árdois, 1982), based on historical records; or Yellow fever  
345 virus (Bryant et al., 2007), HTLMV-1 (Gadelha et al., 2014), Hepatitis C virus  
346 (genotype 2) (Markov et al., 2009) and human herpes simplex virus (Forni et al.,  
347 2020) based on phylogenetic analysis of modern strains from Afro-descendant or  
348 admixed human populations.

349

350 Although we cannot assert where exactly the African-born individuals in this study  
351 contracted B19V or HBV (Africa, America, or the Middle Passage) nor if the cause  
352 of their deaths can be attributed to such infections, the identification of ancient B19V  
353 and HBV in contexts associated with Colonial epidemics in Mexico City is still  
354 relevant in light of their paleopathological marks and the clinical information available  
355 for the closest sequences in the phylogenetic analyses. The reconstructed ancient  
356 B19V genome from individual HSJNC81 is closest to the V9 strain, which was  
357 isolated from an individual with severe anemia (Nguyen et al., 1999) (AJ249437)  
358 (Figure 3b). Noteworthy, individual HSJNC81 displayed cribra orbitalia in the eye

359 sockets and porotic hyperostosis on the cranial vault (Supplementary Figure 11),  
360 morphological changes typically associated with anemias of varying different causes  
361 (Angel, 1966). It is acknowledged that B19V infection can cause severe or even fatal  
362 anemia due to the low level of hemoglobin when present simultaneously with other  
363 blood disorders, as thalassemia, sickle-cell anemia, malaria and iron deficiency  
364 (Broliden et al., 2006; Heegaard & Brown, 2002). Therefore, since B19V infects  
365 precursors of the erythroid lineage (Broliden et al., 2006), it is possible that the  
366 morphological changes found in HSJNC81 might be the result of a severe anemia  
367 caused or enhanced by a B19V infection (Supplementary Discussion 2). Moreover,  
368 the identification of ancient B19V in a Colonial context is noteworthy considering  
369 several recent reports that reveal that measles-like cases were actually attributable  
370 to B19V (De Los Ángeles Ribas et al., 2019; Rezaei et al., 2016). Therefore it is  
371 possible that B19V might have been responsible for some of the numerous cases of  
372 measles that were described in early 16<sup>th</sup> century Mexico (Acuña-Soto et al., 2004;  
373 Mandujano-Sánchez et al., 1982; Wesp, 2017), as well as in historical records that  
374 account for the treatment of an outbreak of measles at the HSJN in 1531 (Meza,  
375 2013) (Supplementary Discussion 2). Nevertheless, this hypothesis requires  
376 additional comprehensive studies aimed to characterize the presence of measles  
377 and rubella viruses from ancient remains, a task that imposes difficult technical  
378 challenges given that RNA is known to degrade rapidly. In fact most ancient viral  
379 RNA genomes have been recovered only from formalin-fixed tissue (Düx et al., 2020;  
380 Xiao et al., 2013)  
381



382 Furthermore, historical records of the autopsies of victims of the 1576 *Cocoliztli*  
383 epidemic treated at the HSJN, describe the observation of enlarged hard liver and  
384 jaundice (Acuña-Soto et al., 2002, 2004; Malvido & Viesca, 1982; Marr & Kiracofe,  
385 2000; Somolinos d'Árdois, 1982), which could be explained by severe liver damage  
386 or epidemic hepatitis (Acuña-Soto et al., 2004; Malvido & Viesca, 1982). This is  
387 noteworthy given both viruses HBV and B19V proliferate in the liver and are  
388 associated to hepatitis and jaundice (Broliden et al., 2006; Yuen et al., 2018).  
389 However, it is important to acknowledge that both viruses have also been previously  
390 identified in aDNA datasets not necessarily associated with disease or epidemic  
391 contexts (Kahila Bar-Gal et al., 2012; Krause-Kyora et al., 2018; Mühlemann, Jones,  
392 et al., 2018; Patterson Ross et al., 2018), thus establishing a direct link would require  
393 additional samples and a more comprehensive pathogen screening to rule out the  
394 involvement of other pathogens. Finally, although our data does not provide  
395 conclusive evidence of the involvement of HBV and B19V in the reported  
396 manifestations of liver damage in *Cocoliztli* autopsies, the identification of these  
397 viruses in likely victims of epidemic outbreaks in the Colonial period opens up new  
398 opportunities for investigating the presence of these viruses in similar contexts. This  
399 type of research is particularly relevant when considering previous hypotheses  
400 favoring the synergistic action of different types of pathogens in these devastating  
401 Colonial epidemics (Somolinos d'Árdois, 1982) (Supplementary Discussion 3).

402

403 It is important to emphasize that our findings should be interpreted with careful  
404 consideration of the historical and social context of the transatlantic slave trade. This  
405 cruel episode in history involved the forced displacement of millions of individuals to

406 the Americas (ca. 250,000 to New Spain (Aguirre-Beltrán, 2005)) under inhumane,  
407 unsanitary and overcrowded conditions that, with no doubt, favored the spread of  
408 infectious diseases (Mandujano-Sánchez et al., 1982). Therefore, the introduction of  
409 these and other pathogens from Africa to the Americas should be attributed to the  
410 brutal and harsh conditions of the Middle passage that enslaved Africans were  
411 subjected to by traders and colonizers, and not to the African peoples themselves.  
412 Moreover, the adverse life conditions for enslaved Africans and Native Americans,  
413 especially during the first decades after colonization, surely favored the spread of  
414 diseases and emergence of epidemics (Mandujano-Sánchez et al., 1982).  
415 Integrative and multidisciplinary approaches are thus needed to understand this  
416 phenomenon at its full spectrum.

417

418 In summary, our study provides direct aDNA evidence of HBV and B19V introduced  
419 to the Americas from Africa during the transatlantic slave trade. The isolation and  
420 characterization of these ancient HBV and B19V genomes represent an important  
421 contribution to the only ancient viral genome recently reported in the Americas  
422 (Barquera et al., 2020). Our results expand our knowledge on the viral agents that  
423 were in circulation during Colonial epidemics like *Cocoliztli*, some of which resulted  
424 in the catastrophic collapse of the immunologically-naïve Indigenous population.  
425 Although we cannot assign a direct causality link between HBV and B19V and  
426 *Cocoliztli*, our findings confirm that these potentially harmful viruses were indeed  
427 circulating in individuals found in archeological contexts associated with this  
428 epidemic outbreak. Further analyses from different sites and samples will help  
429 understand the possible role of these and other pathogens in Colonial epidemics, as

430 well as the full spectrum of pathogens that were introduced to the Americas during  
431 European colonization.

432

## 433 **METHODS**

### 434 *Sample selection and DNA extraction*

435 Dental samples (premolars and molars) were obtained from twenty-one individuals  
436 from the skeletal collection of the HSJN, selected based on their African-related  
437 skeletal indicators (Hernández-Lopez & Negrete, 2012; Karam-Tapia, 2012; Meza,  
438 2013; Ruíz-Albarrán, 2012). Five additional samples were taken from “La  
439 Concepción” chapel, based on their conservation state. Permits 401.1S.3-  
440 2018/1373 and 401.1S.3-2020/1310 to carry out this sampling and aDNA analyses  
441 were obtained by the Archeology Council of the National Institute of Anthropology  
442 and History (INAH) for the Hospital San Jose de los Naturales and “La Concepción”  
443 chapel, respectively.

444

### 445 *DNA extraction and NGS library construction*

446 Bone samples were transported to a dedicated ancient DNA clean-room laboratory  
447 at the International Laboratory for Human Genome Research (LIIGH-UNAM,  
448 Querétaro, Mexico), where DNA extraction and NGS-libraries construction was  
449 performed under the guidelines on contamination control for aDNA studies (Warinner  
450 et al., 2017). Previously reported aDNA extraction protocols were used for the HSJN  
451 (Dabney et al., 2013) and COY (Rohland & Hofreiter, 2007) samples. Double-  
452 stranded DNA (dsDNA) indexed (6bp) sequencing libraries were constructed from  
453 the DNA extract, as previously reported (Meyer & Kircher, 2010). In order to detect

454 contaminants in reagents or by human manipulation, extraction and library  
455 constructions protocols included negative controls (NGS blanks) that were analyzed  
456 in parallel with the same methodology. The resulting NGS dsDNA indexed libraries  
457 were quantified with a Bioanalyzer 2100 (Agilent) and pooled into equimolar  
458 concentrations.

459

#### 460 *NGS sequencing*

461 Pooled libraries were paired-end sequenced on an Illumina NextSeq550 at the  
462 “Laboratorio Nacional de Genómica para la Biodiversidad” (LANGEBIO, Irapuato,  
463 Mexico), with a Mid-output 2x75 format. The reads obtained (R1 and R2) were  
464 merged (>11bp overlap) and trimmed with AdapterRemoval 1.5.4 (Schubert et al.,  
465 2016). Overlapping reads (>30 bp in length) were kept and mapped to the human  
466 genome (hg19) using BWA 0.7.13 (Heng Li & Durbin, 2009). Mapped reads were  
467 used for further human analysis (genetic ancestry, and mitochondrial haplogroup  
468 determination), whereas unmapped reads were used for metagenomic analysis and  
469 viral genome reconstruction.

470

#### 471 *Metagenomic analyses*

472 The NCBI Viral RefSeq database was downloaded on February 2018; this included  
473 7530 viral genomes. MALT 0.4.0 (Vågane et al., 2018) software was used to  
474 taxonomically classify the reads using the viral genomes database. The viral  
475 database was formatted automatically with malt-build once, and not human  
476 (unmapped) reads were aligned with malt-run (85 minimal percent identity). The  
477 produced RMA files with viral abundances were normalized based on the smallest

478 sample size (default) and compared to all the samples from the same archeological  
479 site with MEGAN 6.8.0 (Huson et al., 2016).

480

#### 481 *Capture-enrichment Assay*

482 Twenty-nine viruses were included in the in-solution enrichment design, the  
483 complete list of NCBI IDs is provided in Supplementary methods 5 and  
484 Supplementary Table 1. It contained viral genomes previously recovered from  
485 archeological remains like B19V, B19V-V9, and HBV (consensus genomes),  
486 selected VARV genes, as well as clinically important viral families that are able to  
487 integrate into the human genome, have dsDNA genomes, or dsDNA intermediates.  
488 The resulting design comprised 19,147 ssRNA 80 nt probes targeting, with a 20 nt  
489 interspaced distance, the whole or partial informative regions of eight viral families  
490 of clinical relevance (*Poxviridae*, *Hepadnaviridae*, *Parvoviridae*, *Herpesviridae*,  
491 *Retroviridae*, *Papillomaviridae*, *Polyomaviridae*, *Circoviridae*). To avoid a  
492 simultaneous false-positive DNA enrichment, low complexity regions and human-  
493 like (hg38) sequences were removed (*in silico*). The customized kit was produced  
494 by Arbor Biosciences (Ann Arbor, MI, USA). Capture-enrichment was performed on  
495 the indexed libraries based on the manufacturer's protocol (version 4) to pull-down  
496 aDNA with minimal modifications. Libraries were amplified with 18-20 cycles  
497 (Phusion U Hot Start DNA Polymerase by Thermo Fischer Scientific), purified with  
498 SPRISelect Magnetic Beads (Beckman Coulter) and quantified with a Bioanalyzer  
499 2100 (Agilent). Amplified libraries were then pooled in different concentrations and  
500 deep sequenced yielding  $>1 \times 10^6$  non-human reads (Supplementary Table 4) in  
501 order to saturate the target viral genome. Reads generated from each enriched

502 library were analyzed exactly as the shotgun (not-enriched) libraries. Normalized  
503 abundances between shotgun and captured libraries were compared in MEGAN  
504 6.8.0 (Huson et al., 2016) to evaluate the efficiency and specificity of the enrichment  
505 assay.

506

### 507 *Viral datasets*

508 The full list of accession numbers of the following datasets is given in Supplementary  
509 Methods 8.

510 HBV-Dataset-1 (HBV/DS1): comprises 38 HBV genomes from modern A-J human  
511 genotypes, 2 well-covered ancient HBV genomes (LT992443, LT992459) and a  
512 wholly monkey genome.

513 HBV-Dataset-2 (HBV/DS2): comprises 593 whole genomes downloaded from the  
514 NCBI database in August 2020, that included genomes from A-J genotypes as well  
515 as non-human primates HBV genomes (gibbon, gorilla, and chimpanzee), 19 ancient  
516 HBV genomes (Barquera et al., 2020; Kahila Bar-Gal et al., 2012; Krause-Kyora et  
517 al., 2018, p.; Mühlemann, Jones, et al., 2018; Neukamm et al., 2020; Patterson Ross  
518 et al., 2018) and one ancient HBV genome from this study (HSJN194).

519 B19V-Dataset-1 (B19V/DS1): comprises 13 B19V genomes from human genotypes  
520 1-3 as well as a bovine parvovirus.

521 B19V-Dataset-2 (B19V/DS2): comprises 109 genomes from 1 to 3 B19V genotypes  
522 downloaded from the NCBI database in August 2020, that included the 10 best-  
523 covered ancient genomes from genotype 1 and 2 (Mühlemann, Margaryan, et al.,  
524 2018) as well as 3 ancient B19V from this study. Since many of the reported

525 genomes in our dataset are not complete, only the whole coding region (CDS) was  
526 used.

527

### 528 *Genome Reconstruction and authenticity*

529 HBV: Non-human reads were simultaneously mapped to HBV/DS1 with BWA (aln  
530 algorithm) with seedling disabled (Schubert et al., 2012). The reference sequence  
531 with the most hits was used to map uniquely to this reference and generate a BAM  
532 alignment without duplicates (Ref: GQ331046), from which damage patterns were  
533 determined and damaged sites rescaled using mapDamage 2.0 (Jónsson et al.,  
534 2013), the rescaled alignment was used to produce a consensus genome. All the  
535 HBV mapped reads were analyzed through megaBLAST (Altschul et al., 1990) using  
536 the whole NCBI nr database, in order to verify they were assigned uniquely to HBV  
537 (carried out with Krona 2.7 (Ondov et al., 2011)).

538 B19V: The reconstruction of the B19V ancient genome was done as previously  
539 reported from archeological skeletal remains (Mühlemann, Margaryan, et al., 2018),  
540 but increasing the stringency of some parameters as described next. Non-human  
541 reads were mapped against B19V/DS1 with BWA (aln algorithm) with seedling  
542 disabled (Schubert et al., 2012), if more than 50% of the genome was covered, the  
543 sample was considered positive to B19V. Reads from the B19V-positive libraries  
544 were aligned with blastn (-evalue 0.001) to B19V/DS1 in order to recover all the  
545 parvovirus-like reads. To avoid local alignments, only hits covering >85% of the read  
546 were kept and joined to the B19V mapped reads (from BWA), duplicates were  
547 removed. The resulting reads were analyzed with megaBLAST (Altschul et al., 1990)  
548 using the whole NCBI nr database to verify the top hit was to B19V (carried out with

549 Krona 2.7 (Ondov et al., 2011)). This pipeline was applied for two independent  
550 enrichments assays per sample and the filtered reads from the two capture rounds  
551 were joined. The merged datasets per sample were mapped using as a reference  
552 file the three known B19V genotypes with GeneiousPrime 2019.0.4 (Kearse et al.,  
553 2012) using median/fast sensibility and iterate up to 5 times. The genotype with the  
554 longest covered sequence was selected as the reference for further analysis (Ref:  
555 AB550331). Deamination patterns for HBV and B19V were determined with  
556 mapDamage 2.0 (Jónsson et al., 2013) and damaged sites were rescaled in the  
557 same program to produce a consensus whole genome using SAMtools 1.9 (H. Li et  
558 al., 2009).

559

#### 560 *Phylogenetic analyses*

561 HBV/DS2 and B19V/DS2 were aligned independently in Aliview (Larsson, 2014)  
562 (Muscle algorithm), and evolutionary models were tested under an AICc and BIC in  
563 jModelTest (Darriba et al., 2012). A neighbor joining tree with 1000 bootstraps was  
564 generated in MEGA (Kumar et al., 2018) using a number of differences model for  
565 both alignments. A maximum likelihood tree with 1000 bootstraps was produced in  
566 RAxML 8.2.10 (Stamatakis, 2014) using a Generalized Time-Reversible (GTR)+G  
567 model for both B19V and HBV.

568 To test the presence of a temporal structure in our DS2 (HBV and B19V) a root-tip  
569 distance analysis was performed on Tempest 1.5.3 (Rambaut et al., 2016), a more  
570 detailed analysis was also carried out on a subset (HBV/DS2.1) of sequences just  
571 containing genomes from the HBV Genotype A.



572 The temporal structure found in the B19V/DS2 with the root-tip distance analysis  
573 was corroborated by a date randomization test (DRT) using 20 combinations of our  
574 B19V/DS2 with TipDatingBeast 1.0.5 (Rieux & Khatchikian, 2017) and BEAST 2.5.1  
575 (Drummond et al., 2012).

576 Since our B19V/DS2 presented a clock-like structure with both methods, a dated  
577 Bayesian analysis was generated to estimate the impact of the Colonial viral  
578 genomes on the divergence time from the most recent common ancestor (MRCA).  
579 We used BEAST 2.5.1 (Drummond et al., 2012), with a relaxed lognormal or strict  
580 molecular clock with constant population, Bayesian skyline population or coalescent  
581 exponential population prior. All parameters were mixed and converged into an  
582 estimated sample size (ESS) >200 analyzed in Tracer 1.7 (Rambaut et al., 2018).  
583 The first 25% of trees were discarded (burn in) and a Maximum Clade Credibility  
584 Tree was created with TreeAnnotator (Drummond et al., 2012). The generated trees  
585 were visualized and edited in FigTree 1.4.3 with a midpoint root.

586

#### 587 *Human population genetic analyses*

588 Human-mapped reads (BWA aln) obtained from the pre-capture sequence data of  
589 viral-positive samples were used to infer the genetic ancestry of the hosts. A  
590 Principal Components Analysis (PCA) was carried out using 10 populations (IBS:  
591 Iberian from Spain; CEU: Utah Residents with Northern and Western European  
592 Ancestry ; CHB: Han Chinese in Beijing; MXL: Mexican Ancestry from Los Angeles;  
593 PEL: Peruvians from Lima; CHS: Southern Han Chinese; YRI: Yoruba in Ibadan;  
594 ESN: Esan in Nigeria; GWD: Gambian; MSL: Mende in Sierra Leone) from the 1000  
595 Genomes Project (1000 Genomes Project Consortium et al., 2015) reference panel

596 including genotype data of 1,562,771 single nucleotide variants (SNVs) present in  
597 the MEGA array (Wojcik et al., 2019) from 2,504 individuals (phase 3). Genomic  
598 alignments of each ancient individual (HSJNC81, HSJN240, HSJN194 and COYC4)  
599 were intersected with the positions of the SNVs present in the reference panel  
600 genotype data. Pseudo haploid genotypes were called by randomly selecting one  
601 allele at each intersected site and filtering by a base quality >30. Pseudo haploid  
602 genotypes were also called for the complete reference panel. PCA was performed  
603 on the merged ancient and modern dataset with smartpca (EIGENSOFT package)  
604 (Patterson et al., 2006; A. L. Price et al., 2006) using the option *Isqproject* to project  
605 the ancient individuals into the PC space defined by the modern individuals.

606

#### 607 *Ancestry composition of individual COYC4*

608 A total of 1,246 sites intersected between the 1000 Genomes Project reference  
609 panel and COYC4 ancient genome (see previous section for details). The program  
610 ADMIXTURE (Alexander & Lange, 2011) was run with K values of 2 to 5 and 100  
611 replicates for each K using a different seed number. For each K, the ADMIXTURE  
612 run with the best likelihood was chosen to plot it using AncestryPainter (Feng et al.,  
613 2018).

614

#### 615 *Mitochondrial haplogroup and sex determination*

616 NGS reads were mapped to the human mitochondrial genome reference (rCRS) with  
617 BWA (aln algorithm, -l default), the alignment file was then used to generate a  
618 consensus mitochondrial genome with the program Schmutzi (Renaud et al., 2015)  
619 The assignment of the mitochondrial haplogroup was carried out with Haplogrep

620 (Kloss-Brandstätter et al., 2011; Weissensteiner et al., 2016) using the consensus  
621 sequence as the input. Assignment of biological sex was inferred based on the  
622 fraction of reads mapped to the Y-chromosome (Ry) compared to those mapping to  
623 the Y and X-chromosome (Skoglund et al., 2013).  $Ry < 0.016$  and  $Ry > 0.075$  were  
624 considered XX or XY genotype, respectively. The resulting sex was coherent with  
625 the one inferred morphologically (Supplementary Methods).

626

## 627 **ACKNOWLEDGMENTS**

628 This work was funded by the Wellcome Trust Sanger grant number 208934/Z/17/Z,  
629 and by project IA201219 PAPIIT-DGAPA-UNAM. D.B-M is an Open Philanthropy  
630 Fellow of the Life Sciences Research Foundation (LSRF). We thank the INAH  
631 Archeology Council for the sample permissions 401.1S.3-2018/1373 and 401.1S.3-  
632 2020/1310 for this study using samples from the Hospital San Jose de los Naturales  
633 and the Temple of Immaculate Conception (La Conchita), respectively. We are  
634 grateful with Teodoro Hernández Treviño, Gerardo Arrieta García from the  
635 “Laboratorio Universitario de Geoquímica Isotópica” (LUGIS-UNAM) for their  
636 technical support in performing the  $^{87}\text{Sr}/^{86}\text{Sr}$  analyses and to Luis Alberto Aguilar  
637 Bautista, Alejandro de León Cuevas, Carlos Sair Flores Bautista and Jair Garcia  
638 Sotelo from the “Laboratorio Nacional de Visualización Científica Avanzada”  
639 (LAVIS/UNAM) who stored our data and provided the computational resources to  
640 perform this study. We thank Alejandra Castillo Carbajal and Carina Uribe Díaz for  
641 technical support throughout the project.

642

## 643 **DATA AVAILABILITY**

644 Reconstructed genomes from this study are available in Genbank under accession  
645 number MT108214, MT108215, MT108216, MT108217. Accession number of  
646 sequences used in phylogenetic analysis are indicated in supplementary  
647 information. NGS data is available upon reasonable request.

648 **REFERENCES:**

- 649 1000 Genomes Project Consortium, Auton, A., Brooks, L. D., Durbin, R. M.,  
650 Garrison, E. P., Kang, H. M., Korbel, J. O., Marchini, J. L., McCarthy, S., McVean,  
651 G. A., & Abecasis, G. R. (2015). A global reference for human genetic variation.  
652 *Nature*, 526(7571), 68–74. <https://doi.org/10.1038/nature15393>
- 653 Acuña-Soto, R., Stahle, D. W., Cleaveland, M. K., & Therrell, M. D. (2002).  
654 Megadrought and Megadeath in 16th Century Mexico. *Emerging Infectious*  
655 *Diseases*, 8(4), 360–362. <https://doi.org/10.3201/eid0804.010175>
- 656 Acuña-Soto, R., Stahle, D. W., Therrell, M. D., Griffin, R. D., & Cleaveland, M. K.  
657 (2004). When half of the population died: The epidemic of hemorrhagic fevers of  
658 1576 in Mexico. *FEMS Microbiology Letters*, 240(1), 1–5.  
659 <https://doi.org/10.1016/j.femsle.2004.09.011>
- 660 Aguirre-Beltrán, G. (2005). La presencia del negro en México. *Revista Del CESLA*,  
661 7, 351–367.
- 662 Alexander, D. H., & Lange, K. (2011). Enhancements to the ADMIXTURE  
663 algorithm for individual ancestry estimation. *BMC Bioinformatics*, 12, 246.  
664 <https://doi.org/10.1186/1471-2105-12-246>
- 665 Altschul, S. F., Gish, W., Miller, W., Myers, E. W., & Lipman, D. J. (1990). Basic  
666 local alignment search tool. *Journal of Molecular Biology*, 215(3), 403–410.  
667 [https://doi.org/10.1016/S0022-2836\(05\)80360-2](https://doi.org/10.1016/S0022-2836(05)80360-2)
- 668 Alvarado-Mora, M. V., Romano, C. M., Gomes-Gouvêa, M. S., Gutierrez, M. F.,  
669 Carrilho, F. J., & Pinho, J. R. R. (2012). Phylogenetic analysis of complete genome  
670 sequences of hepatitis B virus from an Afro-Colombian community: Presence of  
671 HBV F3/A1 recombinant strain. *Virology Journal*, 9, 244.

672 <https://doi.org/10.1186/1743-422X-9-244>

673 Andernach, I. E., Nolte, C., Pape, J. W., & Muller, C. P. (2009). Slave trade and  
674 hepatitis B virus genotypes and subgenotypes in Haiti and Africa. *Emerging*  
675 *Infectious Diseases*, 15(8), 1222–1228. <https://doi.org/10.3201/eid1508.081642>

676 Angel, J. L. (1966). Porotic hyperostosis, anemias, malaras, and marshes in the  
677 prehistoric Eastern Mediterranean. *Science (New York, N.Y.)*, 153(3737), 760–763.  
678 <https://doi.org/10.1126/science.153.3737.760>

679 Barquera, R., Lamnidis, T. C., Lankapalli, A. K., Kocher, A., Hernández-Zaragoza,  
680 D. I., Nelson, E. A., Zamora-Herrera, A. C., Ramallo, P., Bernal-Felipe, N., Immel,  
681 A., Bos, K., Acuña-Alonzo, V., Barbieri, C., Roberts, P., Herbig, A., Kühnert, D.,  
682 Márquez-Morfin, L., & Krause, J. (2020). Origin and Health Status of First-  
683 Generation Africans from Early Colonial Mexico. *Current Biology*,  
684 S0960982220304826. <https://doi.org/10.1016/j.cub.2020.04.002>

685 Bastos, M. Q. R., Santos, R. V., M. de Souza, S. M. F., Rodrigues-Carvalho, C.,  
686 Tykot, R. H., Cook, D. C., & Santos, R. V. (2016). Isotopic study of geographic  
687 origins and diet of enslaved Africans buried in two Brazilian cemeteries. *Journal of*  
688 *Archaeological Science*, 70, 82–90. <https://doi.org/10.1016/j.jas.2016.04.020>

689 Brichler, S., Lagathu, G., Chekaraou, M. A., Le Gal, F., Edouard, A., Dény, P.,  
690 Césaire, R., & Gordien, E. (2013). African, Amerindian and European hepatitis B  
691 virus strains circulate on the Caribbean Island of Martinique. *The Journal of*  
692 *General Virology*, 94(Pt 10), 2318–2329. <https://doi.org/10.1099/vir.0.055459-0>

693 Briggs, A. W., Stenzel, U., Johnson, P. L. F., Green, R. E., Kelso, J., Prüfer, K.,  
694 Meyer, M., Krause, J., Ronan, M. T., Lachmann, M., & Pääbo, S. (2007). Patterns  
695 of damage in genomic DNA sequences from a Neandertal. *Proceedings of the*

- 696 *National Academy of Sciences of the United States of America*, 104(37), 14616–  
697 14621. <https://doi.org/10.1073/pnas.0704665104>
- 698 Broliden, K., Tolfvenstam, T., & Norbeck, O. (2006). Clinical aspects of parvovirus  
699 B19 infection. *Journal of Internal Medicine*, 260(4), 285–304.  
700 <https://doi.org/10.1111/j.1365-2796.2006.01697.x>
- 701 Bryant, J. E., Holmes, E. C., & Barrett, A. D. T. (2007). Out of Africa: A Molecular  
702 Perspective on the Introduction of Yellow Fever Virus into the Americas. *PLoS*  
703 *Pathogens*, 3(5). <https://doi.org/10.1371/journal.ppat.0030075>
- 704 Candotti, D., Etiz, N., Parsyan, A., & Allain, J.-P. (2004). Identification and  
705 Characterization of Persistent Human Erythrovirus Infection in Blood Donor  
706 Samples. *Journal of Virology*, 78(22), 12169–12178.  
707 <https://doi.org/10.1128/JVI.78.22.12169-12178.2004>
- 708 Cheng, A. P., Burnham, P., Lee, J. R., Cheng, M. P., Suthanthiran, M., Dadhania,  
709 D., & De Vlaminc, I. (2019). A cell-free DNA metagenomic sequencing assay that  
710 integrates the host injury response to infection. *Proceedings of the National*  
711 *Academy of Sciences*, 116(37), 18738–18744.  
712 <https://doi.org/10.1073/pnas.1906320116>
- 713 Dabney, J., Knapp, M., Glocke, I., Gansauge, M.-T., Weihmann, A., Nickel, B.,  
714 Valdiosera, C., García, N., Pääbo, S., Arsuaga, J.-L., & Meyer, M. (2013).  
715 Complete mitochondrial genome sequence of a Middle Pleistocene cave bear  
716 reconstructed from ultrashort DNA fragments. *Proceedings of the National*  
717 *Academy of Sciences of the United States of America*, 110(39), 15758–15763.  
718 <https://doi.org/10.1073/pnas.1314445110>
- 719 Darriba, D., Taboada, G. L., Doallo, R., & Posada, D. (2012). jModelTest 2: More

720 models, new heuristics and high-performance computing. *Nature Methods*, 9(8),  
721 772. <https://doi.org/10.1038/nmeth.2109>

722 De Los Ángeles Ribas, M., Tejero, Y., Cordero, Y., Pérez, D., Sausy, A., Muller, C.  
723 P., & Hübschen, J. M. (2019). Identification of human parvovirus B19 among  
724 measles and rubella suspected patients from Cuba. *Journal of Medical Virology*,  
725 91(7), 1351–1354. <https://doi.org/10.1002/jmv.25444>

726 Drummond, A. J., Suchard, M. A., Xie, D., & Rambaut, A. (2012). Bayesian  
727 Phylogenetics with BEAUti and the BEAST 1.7. *Molecular Biology and Evolution*,  
728 29(8), 1969–1973. <https://doi.org/10.1093/molbev/mss075>

729 Duggan, A. T., Perdomo, M. F., Piombino-Mascali, D., Marciniak, S., Poinar, D.,  
730 Emery, M. V., Buchmann, J. P., Duchêne, S., Jankauskas, R., Humphreys, M.,  
731 Golding, G. B., Southon, J., Devault, A., Rouillard, J.-M., Sahl, J. W., Dutour, O.,  
732 Hedman, K., Sajantila, A., Smith, G. L., ... Poinar, H. N. (2016). 17th Century  
733 Variola Virus Reveals the Recent History of Smallpox. *Current Biology: CB*, 26(24),  
734 3407–3412. <https://doi.org/10.1016/j.cub.2016.10.061>

735 Düx, A., Lequime, S., Patrono, L. V., Vrancken, B., Boral, S., Gogarten, J. F.,  
736 Hilbig, A., Horst, D., Merkel, K., Prepoint, B., Santibanez, S., Schlotterbeck, J.,  
737 Suchard, M. A., Ulrich, M., Widulin, N., Mankertz, A., Leendertz, F. H., Harper, K.,  
738 Schnalke, T., ... Calvignac-Spencer, S. (2020). Measles virus and rinderpest virus  
739 divergence dated to the sixth century BCE. *Science*, 368(6497), 1367–1370.  
740 <https://doi.org/10.1126/science.aba9411>

741 Feng, Q., Lu, D., & Xu, S. (2018). AncestryPainter: A Graphic Program for  
742 Displaying Ancestry Composition of Populations and Individuals. *Genomics*,  
743 *Proteomics & Bioinformatics*, 16(5), 382–385.



- 744 <https://doi.org/10.1016/j.gpb.2018.05.002>
- 745 Forni, D., Pontremoli, C., Clerici, M., Pozzoli, U., Cagliani, R., & Sironi, M. (2020).  
746 Recent out-of-Africa migration of human herpes simplex viruses. *Molecular Biology*  
747 *and Evolution*, msaa001. <https://doi.org/10.1093/molbev/msaa001>
- 748 Freitas, R. B., Melo, F. L., Oliveira, D. S., Romano, C. M., Freitas, M. R. C.,  
749 Macêdo, O., Linhares, A. C., de A Zanotto, P. M., & Durigon, E. L. (2008).  
750 Molecular characterization of human erythrovirus B19 strains obtained from  
751 patients with several clinical presentations in the Amazon region of Brazil. *Journal*  
752 *of Clinical Virology: The Official Publication of the Pan American Society for*  
753 *Clinical Virology*, 43(1), 60–65. <https://doi.org/10.1016/j.jcv.2008.03.033>
- 754 Fricke, F., Laffoon, J., Victorina, A., & Haviser, J. (2020). Delayed physical  
755 development in a first generation enslaved African woman from Pietermaai,  
756 Curaçao. *International Journal of Osteoarchaeology*, 30(1), 43–52.  
757 <https://doi.org/10.1002/oa.2829>
- 758 Gadelha, S. R., Aleluia, M. M., Mello, M. A., Rego, F. F., Pereira, L. S., Galvão-  
759 Castro, B., Gonçalves, M., Sousa, S. M., & Alcântara, L. C. (2014). The origin of  
760 HTLV-1 in the South Bahia by phylogenetic, mitochondrial DNA and  $\beta$ -globin  
761 analysis. *Retrovirology*, 11(Suppl 1), P49. [https://doi.org/10.1186/1742-4690-11-](https://doi.org/10.1186/1742-4690-11-S1-P49)  
762 [S1-P49](https://doi.org/10.1186/1742-4690-11-S1-P49)
- 763 Heegaard, E. D., & Brown, K. E. (2002). Human Parvovirus B19. *Clinical*  
764 *Microbiology Reviews*, 15(3), 485–505. [https://doi.org/10.1128/CMR.15.3.485-](https://doi.org/10.1128/CMR.15.3.485-505.2002)  
765 [505.2002](https://doi.org/10.1128/CMR.15.3.485-505.2002)
- 766 Hernández-Lopez, P. E., & Negrete, S. (2012). ¿Realmente Eran Indios? Afinidad  
767 biológica entre las personas atendidas en el Hospital Real San Jose de los

768 *Naturales, siglos XVI - XVIII*. Escuela Nacional de Antropología e Historia.

769 Hübschen, J. M., Mihneva, Z., Mentis, A. F., Schneider, F., Aboudy, Y., Grossman,  
770 Z., Rudich, H., Kasymbekova, K., Sarv, I., Nedeljkovic, J., Tahita, M. C., Tarnagda,  
771 Z., Ouedraogo, J.-B., Gerasimova, A. G., Moskaleva, T. N., Tikhonova, N. T.,  
772 Chitadze, N., Forbi, J. C., Faneye, A. O., ... Muller, C. P. (2009). Phylogenetic  
773 analysis of human parvovirus b19 sequences from eleven different countries  
774 confirms the predominance of genotype 1 and suggests the spread of genotype 3b.  
775 *Journal of Clinical Microbiology*, 47(11), 3735–3738.  
776 <https://doi.org/10.1128/JCM.01201-09>

777 Huson, D. H., Beier, S., Flade, I., Górská, A., El-Hadidi, M., Mitra, S., Ruscheweyh,  
778 H.-J., & Tappu, R. (2016). MEGAN Community Edition—Interactive Exploration  
779 and Analysis of Large-Scale Microbiome Sequencing Data. *PLoS Computational*  
780 *Biology*, 12(6), e1004957. <https://doi.org/10.1371/journal.pcbi.1004957>

781 Jain, P., Jain, A., Prakash, S., Khan, D. N., Singh, D. D., Kumar, A., Moulik, N. R.,  
782 & Chandra, T. (2015). Prevalence and genotypic characterization of human  
783 parvovirus B19 in children with hemato-oncological disorders in North India.  
784 *Journal of Medical Virology*, 87(2), 303–309. <https://doi.org/10.1002/jmv.24028>

785 Jónsson, H., Ginolhac, A., Schubert, M., Johnson, P. L. F., & Orlando, L. (2013).  
786 mapDamage2.0: Fast approximate Bayesian estimates of ancient DNA damage  
787 parameters. *Bioinformatics (Oxford, England)*, 29(13), 1682–1684.  
788 <https://doi.org/10.1093/bioinformatics/btt193>

789 Kahila Bar-Gal, G., Kim, M. J., Klein, A., Shin, D. H., Oh, C. S., Kim, J. W., Kim, T.-  
790 H., Kim, S. B., Grant, P. R., Pappo, O., Spigelman, M., & Shouval, D. (2012).  
791 Tracing hepatitis B virus to the 16th century in a Korean mummy. *Hepatology*,

- 792 56(5), 1671–1680. <https://doi.org/10.1002/hep.25852>
- 793 Karam-Tapia, C. E. (2012). *Estimación del Mestizaje Mediante la Morfología*  
794 *Dental en la Ciudad de México (Siglo XVI al XIX)*. Escuela Nacional de  
795 Antropología e Historia.
- 796 Kearse, M., Moir, R., Wilson, A., Stones-Havas, S., Cheung, M., Sturrock, S.,  
797 Buxton, S., Cooper, A., Markowitz, S., Duran, C., Thierer, T., Ashton, B., Meintjes,  
798 P., & Drummond, A. (2012). Geneious Basic: An integrated and extendable  
799 desktop software platform for the organization and analysis of sequence data.  
800 *Bioinformatics*, 28(12), 1647–1649. <https://doi.org/10.1093/bioinformatics/bts199>
- 801 Key, F. M., Posth, C., Krause, J., Herbig, A., & Bos, K. I. (2017). Mining  
802 Metagenomic Data Sets for Ancient DNA: Recommended Protocols for  
803 Authentication. *Trends in Genetics: TIG*, 33(8), 508–520.  
804 <https://doi.org/10.1016/j.tig.2017.05.005>
- 805 Kloss-Brandstätter, A., Pacher, D., Schönherr, S., Weissensteiner, H., Binna, R.,  
806 Specht, G., & Kronenberg, F. (2011). HaploGrep: A fast and reliable algorithm for  
807 automatic classification of mitochondrial DNA haplogroups. *Human Mutation*,  
808 32(1), 25–32. <https://doi.org/10.1002/humu.21382>
- 809 Kostaki, E.-G., Karamitros, T., Stefanou, G., Mamais, I., Angelis, K., Hatzakis, A.,  
810 Kramvis, A., & Paraskevis, D. (2018). Unravelling the history of hepatitis B virus  
811 genotypes A and D infection using a full-genome phylogenetic and  
812 phylogeographic approach. *ELife*, 7. <https://doi.org/10.7554/eLife.36709>
- 813 Kramvis, A. (2014). Genotypes and Genetic Variability of Hepatitis B Virus.  
814 *Intervirology*, 57(3–4), 141–150. <https://doi.org/10.1159/000360947>
- 815 Krause-Kyora, B., Susat, J., Key, F. M., Kühnert, D., Bosse, E., Immel, A., Rinne,

816 C., Kornell, S.-C., Yepes, D., Franzenburg, S., Heyne, H. O., Meier, T., Lösch, S.,  
817 Meller, H., Friederich, S., Nicklisch, N., Alt, K. W., Schreiber, S., Tholey, A., ...  
818 Krause, J. (2018). Neolithic and medieval virus genomes reveal complex evolution  
819 of hepatitis B. *ELife*, 7. <https://doi.org/10.7554/eLife.36666>

820 Kumar, S., Stecher, G., Li, M., Knyaz, C., & Tamura, K. (2018). MEGA X:  
821 Molecular Evolutionary Genetics Analysis across Computing Platforms. *Molecular*  
822 *Biology and Evolution*, 35(6), 1547–1549. <https://doi.org/10.1093/molbev/msy096>

823 Larsson, A. (2014). AliView: A fast and lightweight alignment viewer and editor for  
824 large datasets. *Bioinformatics*, 30(22), 3276–3278.  
825 <https://doi.org/10.1093/bioinformatics/btu531>

826 Li, H., Handsaker, B., Wysoker, A., Fennell, T., Ruan, J., Homer, N., Marth, G.,  
827 Abecasis, G., Durbin, R., & 1000 Genome Project Data Processing Subgroup.  
828 (2009). The Sequence Alignment/Map format and SAMtools. *Bioinformatics*,  
829 25(16), 2078–2079. <https://doi.org/10.1093/bioinformatics/btp352>

830 Li, Heng, & Durbin, R. (2009). Fast and accurate short read alignment with  
831 Burrows–Wheeler transform. *Bioinformatics*, 25(14), 1754–1760.  
832 <https://doi.org/10.1093/bioinformatics/btp324>

833 Lindahl, T. (1993). Instability and decay of the primary structure of DNA. *Nature*,  
834 362(6422), 709–715. <https://doi.org/10.1038/362709a0>

835 Lindo, J., Huerta-Sánchez, E., Nakagome, S., Rasmussen, M., Petzelt, B., Mitchell,  
836 J., Cybulski, J. S., Willerslev, E., DeGiorgio, M., & Malhi, R. S. (2016). A time  
837 transect of exomes from a Native American population before and after European  
838 contact. *Nature Communications*, 7(1), 13175.  
839 <https://doi.org/10.1038/ncomms13175>

- 840 Luo, Y., & Qiu, J. (2015). Human parvovirus B19: A mechanistic overview of  
841 infection and DNA replication. *Future Virology*, 10(2), 155–167.  
842 <https://doi.org/10.2217/fvl.14.103>
- 843 Malvido, E., & Viesca, C. (1982). La epidemia de cocoliztli de 1576. In E.  
844 Florescano & E. Malvido (Eds.), *Ensayos sobre la historia de las epidemias en*  
845 *México*. (pp. 27–32). Instituto Mexicano del Seguro Social.
- 846 Mandujano-Sánchez, A., Solache, L. C., & Mandujano, M. A. (1982). Historia de  
847 las Epidemias en el México Antiguo: Algunos Aspectos Biológicos y Sociales. In E.  
848 Florescano & E. Malvido (Eds.), *Ensayos sobre la historia de las epidemias en*  
849 *México*. (pp. 9–21). Instituto Mexicano del Seguro Social.
- 850 Markov, P. V., Pepin, J., Frost, E., Deslandes, S., Labbé, A.-C., & Pybus, O. G.  
851 (2009). Phylogeography and molecular epidemiology of hepatitis C virus genotype  
852 2 in Africa. *The Journal of General Virology*, 90(Pt 9), 2086–2096.  
853 <https://doi.org/10.1099/vir.0.011569-0>
- 854 Marr, J. S., & Kiracofe, J. B. (2000). Was the huey cocoliztli a haemorrhagic fever?  
855 *Medical History*, 44(3), 341–362.
- 856 Meyer, M., & Kircher, M. (2010). Illumina Sequencing Library Preparation for Highly  
857 Multiplexed Target Capture and Sequencing. *Cold Spring Harbor Protocols*,  
858 2010(6), 1–10. <https://doi.org/10.1101/pdb.prot5448>
- 859 Meza, A. (2013). Presencia africana en el cementerio del Hospital Real de San  
860 José de los Naturales. *Arqueología mexicana*, 119, 40–44.
- 861 Moreno-Cabrera, M. de la L., Meraz-Moreno, A., & Cervantes-Rosado, J. (2015).  
862 Relleno aligerado con vasijas cerámicas en el templo de la Inmaculada  
863 Concepción, en Coyoacán. In *Boletín de monumentos históricos* 35 (Vol. 35, pp.

864 121–134). Instituto Nacional de Antropología e Historia.

865 Mühlemann, B., Jones, T. C., Damgaard, P. de B., Allentoft, M. E., Shevnina, I.,  
866 Logvin, A., Usmanova, E., Panyushkina, I. P., Boldgiv, B., Bazartseren, T.,  
867 Tashbaeva, K., Merz, V., Lau, N., Smrčka, V., Voyakin, D., Kitov, E., Epimakhov,  
868 A., Pokutta, D., Vicze, M., ... Willerslev, E. (2018). Ancient hepatitis B viruses from  
869 the Bronze Age to the Medieval period. *Nature*, 557(7705), 418–423.  
870 <https://doi.org/10.1038/s41586-018-0097-z>

871 Mühlemann, B., Margaryan, A., Damgaard, P. de B., Allentoft, M. E., Vinner, L.,  
872 Hansen, A. J., Weber, A., Bazaliiskii, V. I., Molak, M., Arneborg, J., Bogdanowicz,  
873 W., Falys, C., Sablin, M., Smrčka, V., Sten, S., Tashbaeva, K., Lynnerup, N.,  
874 Sikora, M., Smith, D. J., ... Jones, T. C. (2018). Ancient human parvovirus B19 in  
875 Eurasia reveals its long-term association with humans. *Proceedings of the National*  
876 *Academy of Sciences of the United States of America*, 115(29), 7557–7562.  
877 <https://doi.org/10.1073/pnas.1804921115>

878 Mühlemann, B., Vinner, L., Margaryan, A., Wilhelmson, H., de la Fuente Castro,  
879 C., Allentoft, M. E., de Barros Damgaard, P., Hansen, A. J., Holtsmark Nielsen, S.,  
880 Strand, L. M., Bill, J., Buzhilova, A., Pushkina, T., Falys, C., Khartanovich, V.,  
881 Moiseyev, V., Jørkov, M. L. S., Østergaard Sørensen, P., Magnusson, Y., ...  
882 Sikora, M. (2020). Diverse variola virus (smallpox) strains were widespread in  
883 northern Europe in the Viking Age. *Science (New York, N.Y.)*, 369(6502).  
884 <https://doi.org/10.1126/science.aaw8977>

885 Neukamm, J., Pfrengle, S., Molak, M., Seitz, A., Francken, M., Eppenberger, P.,  
886 Avanzi, C., Reiter, E., Urban, C., Welte, B., Stockhammer, P. W., Teßmann, B.,  
887 Herbig, A., Harvati, K., Nieselt, K., Krause, J., & Schuenemann, V. J. (2020). 2000-

888 year-old pathogen genomes reconstructed from metagenomic analysis of Egyptian  
889 mummified individuals. *BMC Biology*, 18(1), 108. [https://doi.org/10.1186/s12915-](https://doi.org/10.1186/s12915-020-00839-8)  
890 020-00839-8

891 Nguyen, Q. T., Sifer, C., Schneider, V., Allaume, X., Servant, A., Bernaudin, F.,  
892 Auguste, V., & Garbarg-Chenon, A. (1999). Novel Human Erythrovirus Associated  
893 with Transient Aplastic Anemia. *Journal of Clinical Microbiology*, 37(8), 2483–2487.

894 Ondov, B. D., Bergman, N. H., & Phillippy, A. M. (2011). Interactive metagenomic  
895 visualization in a Web browser. *BMC Bioinformatics*, 12(1), 385.  
896 <https://doi.org/10.1186/1471-2105-12-385>

897 Pajer, P., Dresler, J., Kabíckova, H., Písa, L., Aganov, P., Fucik, K., Elleder, D.,  
898 Hron, T., Kuzelka, V., Velemínský, P., Klimentova, J., Fucikova, A., Pejchal, J.,  
899 Hrabakova, R., Benes, V., Rausch, T., Dundr, P., Pilin, A., Cabala, R., ... Meyer,  
900 H. (2017). Characterization of Two Historic Smallpox Specimens from a Czech  
901 Museum. *Viruses*, 9(8). <https://doi.org/10.3390/v9080200>

902 Patterson, N., Price, A. L., & Reich, D. (2006). Population Structure and  
903 Eigenanalysis. *PLoS Genetics*, 2(12), e190.  
904 <https://doi.org/10.1371/journal.pgen.0020190>

905 Patterson Ross, Z., Klunk, J., Fornaciari, G., Giuffra, V., Duchêne, S., Duggan, A.  
906 T., Poinar, D., Douglas, M. W., Eden, J.-S., Holmes, E. C., & Poinar, H. N. (2018).  
907 The paradox of HBV evolution as revealed from a 16th century mummy. *PLoS*  
908 *Pathogens*, 14(1), e1006750. <https://doi.org/10.1371/journal.ppat.1006750>

909 Pourkarim, M. R., Amini-Bavil-Olyaei, S., Kurbanov, F., Van Ranst, M., & Tacke,  
910 F. (2014). Molecular identification of hepatitis B virus genotypes/subgenotypes:  
911 Revised classification hurdles and updated resolutions. *World Journal of*



912 *Gastroenterology*, 20(23), 7152–7168. <https://doi.org/10.3748/wjg.v20.i23.7152>

913 Pourkarim, M. R., Lemey, P., Amini-Bavil-Olyaei, S., Maes, P., & Van Ranst, M.  
914 (2010). Novel hepatitis B virus subgenotype A6 in African-Belgian patients. *Journal*  
915 *of Clinical Virology: The Official Publication of the Pan American Society for*  
916 *Clinical Virology*, 47(1), 93–96. <https://doi.org/10.1016/j.jcv.2009.09.032>

917 Price, A. L., Patterson, N. J., Plenge, R. M., Weinblatt, M. E., Shadick, N. A., &  
918 Reich, D. (2006). Principal components analysis corrects for stratification in  
919 genome-wide association studies. *Nature Genetics*, 38(8), 904–909.  
920 <https://doi.org/10.1038/ng1847>

921 Price, T. D., Burton, J. H., Cucina, A., Zabala, P., Frei, R., Tykot, R. H., & Tiesler,  
922 V. (2012). Isotopic Studies of Human Skeletal Remains from a Sixteenth to  
923 Seventeenth Century AD Churchyard in Campeche, Mexico: Diet, Place of Origin,  
924 and Age. *Current Anthropology*, 53(4), 396–433. <https://doi.org/10.1086/666492>

925 Pruitt, K. D., Tatusova, T., & Maglott, D. R. (2007). NCBI reference sequences  
926 (RefSeq): A curated non-redundant sequence database of genomes, transcripts  
927 and proteins. *Nucleic Acids Research*, 35(Database issue), D61-65.  
928 <https://doi.org/10.1093/nar/gkl842>

929 Pyöriä, L., Toppinen, M., Mäntylä, E., Hedman, L., Aaltonen, L.-M., Vihinen-Ranta,  
930 M., Ilmarinen, T., Söderlund-Venermo, M., Hedman, K., & Perdomo, M. F. (2017).  
931 Extinct type of human parvovirus B19 persists in tonsillar B cells. *Nature*  
932 *Communications*, 8, 14930. <https://doi.org/10.1038/ncomms14930>

933 Quintero, A., Martínez, D., Alarcón De Noya, B., Costagliola, A., Urbina, L.,  
934 González, N., Liprandi, F., Castro De Guerra, D., & Pujol, F. H. (2002). Molecular  
935 epidemiology of hepatitis B virus in Afro-Venezuelan populations. *Archives of*



- 936 *Virology*, 147(9), 1829–1836. <https://doi.org/10.1007/s00705-002-0842-2>
- 937 Rambaut, A., Drummond, A. J., Xie, D., Baele, G., & Suchard, M. A. (2018).  
938 Posterior Summarization in Bayesian Phylogenetics Using Tracer 1.7. *Systematic*  
939 *Biology*, 67(5), 901–904. <https://doi.org/10.1093/sysbio/syy032>
- 940 Rambaut, A., Lam, T. T., Max Carvalho, L., & Pybus, O. G. (2016). Exploring the  
941 temporal structure of heterochronous sequences using TempEst (formerly Path-O-  
942 Gen). *Virus Evolution*, 2(1), vew007. <https://doi.org/10.1093/ve/vew007>
- 943 Renaud, G., Slon, V., Duggan, A. T., & Kelso, J. (2015). Schmutzi: Estimation of  
944 contamination and endogenous mitochondrial consensus calling for ancient DNA.  
945 *Genome Biology*, 16(1), 224. <https://doi.org/10.1186/s13059-015-0776-0>
- 946 Rezaei, F., Sarshari, B., Ghavami, N., Meysami, P., Shadab, A., Salimi, H., &  
947 Mokhtari-Azad, T. (2016). Prevalence and genotypic characterization of Human  
948 Parvovirus B19 in children with measles- and rubella-like illness in Iran. *Journal of*  
949 *Medical Virology*, 88(6), 947–953. <https://doi.org/10.1002/jmv.24425>
- 950 Rieux, A., & Balloux, F. (2016). Inferences from tip-calibrated phylogenies: A  
951 review and a practical guide. *Molecular Ecology*, 25(9), 1911–1924.  
952 <https://doi.org/10.1111/mec.13586>
- 953 Rieux, A., & Khatchikian, C. E. (2017). Tipdatingbeast an r package to assist the  
954 implementation of phylogenetic tip-dating tests using beast. *Molecular Ecology*  
955 *Resources*, 17(4), 608–613. <https://doi.org/10.1111/1755-0998.12603>
- 956 Rinckel, L. A., Buno, B. R., Gierman, T. M., & Lee, D. C. (2009). Discovery and  
957 analysis of a novel parvovirus B19 Genotype 3 isolate in the United States.  
958 *Transfusion*, 49(7), 1488–1492. <https://doi.org/10.1111/j.1537-2995.2009.02160.x>
- 959 Rohland, N., & Hofreiter, M. (2007). Ancient DNA extraction from bones and teeth.

960 *Nature Protocols*, 2(7), 1756–1762. <https://doi.org/10.1038/nprot.2007.247>

961 Roman, S., Tanaka, Y., Khan, A., Kurbanov, F., Kato, H., Mizokami, M., &

962 Panduro, A. (2010). Occult hepatitis B in the genotype H-infected Nahuas and

963 Huichol native Mexican population. *Journal of Medical Virology*, 82(9), 1527–1536.

964 <https://doi.org/10.1002/jmv.21846>

965 Rotimi, C. N., Tekola-Ayele, F., Baker, J. L., & Shriner, D. (2016). The African

966 Diaspora: History, Adaptation and Health. *Current Opinion in Genetics &*

967 *Development*, 41, 77–84. <https://doi.org/10.1016/j.gde.2016.08.005>

968 Ruíz-Albarrán, P. (2012). *Estudio de variabilidad biológica en la colección*

969 *esquelética Hospital Real de San José de los Naturales. Un acercamiento a través*

970 *de la técnica de morfometría geométrica*. Escuela Nacional de Antropología e

971 Historia.

972 Salas, A., Richards, M., Lareu, M.-V., Scozzari, R., Coppa, A., Torroni, A.,

973 Macaulay, V., & Carracedo, Á. (2004). The African Diaspora: Mitochondrial DNA

974 and the Atlantic Slave Trade. *American Journal of Human Genetics*, 74(3), 454–

975 465.

976 Sanabani, S., Neto, W. K., Pereira, J., & Sabino, E. C. (2006). Sequence Variability

977 of Human Erythroviruses Present in Bone Marrow of Brazilian Patients with

978 Various Parvovirus B19-Related Hematological Symptoms. *Journal of Clinical*

979 *Microbiology*, 44(2), 604–606. <https://doi.org/10.1128/JCM.44.2.604-606.2006>

980 Schneider, B., Höne, A., Tolba, R. H., Fischer, H.-P., Blümel, J., & Eis-Hübinger, A.

981 M. (2008). Simultaneous persistence of multiple genome variants of human

982 parvovirus B19. *Journal of General Virology*, 89(1), 164–176.

983 <https://doi.org/10.1099/vir.0.83053-0>

- 984 Schroeder, H., O'Connell, T. C., Evans, J. A., Shuler, K. A., & Hedges, R. E. M.  
985 (2009). Trans-Atlantic slavery: Isotopic evidence for forced migration to Barbados.  
986 *American Journal of Physical Anthropology*, 139(4), 547–557.  
987 <https://doi.org/10.1002/ajpa.21019>
- 988 Schubert, M., Ginolhac, A., Lindgreen, S., Thompson, J. F., Al-Rasheid, K. A. S.,  
989 Willerslev, E., Krogh, A., & Orlando, L. (2012). Improving ancient DNA read  
990 mapping against modern reference genomes. *BMC Genomics*, 13, 178.  
991 <https://doi.org/10.1186/1471-2164-13-178>
- 992 Schubert, M., Lindgreen, S., & Orlando, L. (2016). AdapterRemoval v2: Rapid  
993 adapter trimming, identification, and read merging. *BMC Research Notes*, 9.  
994 <https://doi.org/10.1186/s13104-016-1900-2>
- 995 Servant, A., Laperche, S., Lallemand, F., Marinho, V., De Saint Maur, G., Meritet,  
996 J. F., & Garbarg-Chenon, A. (2002). Genetic Diversity within Human  
997 Erythroviruses: Identification of Three Genotypes. *Journal of Virology*, 76(18),  
998 9124–9134. <https://doi.org/10.1128/JVI.76.18.9124-9134.2002>
- 999 Skoglund, P., Storå, J., Götherström, A., & Jakobsson, M. (2013). Accurate sex  
1000 identification of ancient human remains using DNA shotgun sequencing. *Journal of*  
1001 *Archaeological Science*, 40(12), 4477–4482.  
1002 <https://doi.org/10.1016/j.jas.2013.07.004>
- 1003 Somolinos d'Árdois, G. (1982). Las epidemias en México durante el siglo XVI. In E.  
1004 Florescano & E. Malvido (Eds.), *Ensayos sobre la historia de las epidemias en*  
1005 *México*. (pp. 138–143). Instituto Mexicano del Seguro Social.
- 1006 Spyrou, M. A., Bos, K. I., Herbig, A., & Krause, J. (2019). Ancient pathogen  
1007 genomics as an emerging tool for infectious disease research. *Nature Reviews*.

- 1008 *Genetics*, 20(6), 323–340. <https://doi.org/10.1038/s41576-019-0119-1>
- 1009 Stamatakis, A. (2014). RAxML version 8: A tool for phylogenetic analysis and post-  
1010 analysis of large phylogenies. *Bioinformatics*, 30(9), 1312–1313.  
1011 <https://doi.org/10.1093/bioinformatics/btu033>
- 1012 Tithi, S. S., Aylward, F. O., Jensen, R. V., & Zhang, L. (2018). FastViromeExplorer:  
1013 A pipeline for virus and phage identification and abundance profiling in  
1014 metagenomics data. *PeerJ*, 6, e4227. <https://doi.org/10.7717/peerj.4227>
- 1015 Vågene, Å. J., Herbig, A., Campana, M. G., García, N. M. R., Warinner, C., Sabin,  
1016 S., Spyrou, M. A., Valtueña, A. A., Huson, D., Tuross, N., Bos, K. I., & Krause, J.  
1017 (2018). Salmonella enterica genomes from victims of a major sixteenth-century  
1018 epidemic in Mexico. *Nature Ecology & Evolution*, 2(3), 520.  
1019 <https://doi.org/10.1038/s41559-017-0446-6>
- 1020 Valencia Pacheco, G., Nakazawa Ueji, Y. E., Rodríguez Dzul, E. A., Angulo  
1021 Ramírez, A. V., López Villanueva, R. F., Quintal Ortiz, I. G., & Rosado Paredes, E.  
1022 P. (2017). Serological and molecular analysis of parvovirus B19 infection in Mayan  
1023 women with systemic lupus erythematosus in Mexico. *Colombia Médica*, v48(i3),  
1024 105–112. <https://doi.org/10.25100/cm.v48i3.2981>
- 1025 Warinner, C., Herbig, A., Mann, A., Fellows Yates, J. A., Weiß, C. L., Burbano, H.  
1026 A., Orlando, L., & Krause, J. (2017). A Robust Framework for Microbial  
1027 Archaeology. *Annual Review of Genomics and Human Genetics*, 18, 321–356.  
1028 <https://doi.org/10.1146/annurev-genom-091416-035526>
- 1029 Weissensteiner, H., Pacher, D., Kloss-Brandstätter, A., Forer, L., Specht, G.,  
1030 Bandelt, H.-J., Kronenberg, F., Salas, A., & Schönherr, S. (2016). HaploGrep 2:  
1031 Mitochondrial haplogroup classification in the era of high-throughput sequencing.

- 1032 *Nucleic Acids Research*, 44(W1), W58–W63. <https://doi.org/10.1093/nar/gkw233>
- 1033 Wesp, J. K. (2017). Caring for Bodies or Simply Saving Souls: The Emergence of  
1034 Institutional Care in Spanish Colonial America. In L. Tilley & A. A. Schrenk (Eds.),  
1035 *New Developments in the Bioarchaeology of Care: Further Case Studies and*  
1036 *Expanded Theory* (pp. 253–276). Springer International Publishing.  
1037 [https://doi.org/10.1007/978-3-319-39901-0\\_13](https://doi.org/10.1007/978-3-319-39901-0_13)
- 1038 Wojcik, G. L., Graff, M., Nishimura, K. K., Tao, R., Haessler, J., Gignoux, C. R.,  
1039 Highland, H. M., Patel, Y. M., Sorokin, E. P., Avery, C. L., Belbin, G. M., Bien, S.  
1040 A., Cheng, I., Cullina, S., Hodonsky, C. J., Hu, Y., Huckins, L. M., Jeff, J., Justice,  
1041 A. E., ... Carlson, C. S. (2019). Genetic analyses of diverse populations improves  
1042 discovery for complex traits. *Nature*, 570(7762), 514–518.  
1043 <https://doi.org/10.1038/s41586-019-1310-4>
- 1044 Xiao, Y.-L., Kash, J. C., Beres, S. B., Sheng, Z.-M., Musser, J. M., &  
1045 Taubenberger, J. K. (2013). High-throughput RNA sequencing of a formalin-fixed,  
1046 paraffin-embedded autopsy lung tissue sample from the 1918 influenza pandemic.  
1047 *The Journal of Pathology*, 229(4), 535–545. <https://doi.org/10.1002/path.4145>
- 1048 Yuen, M.-F., Chen, D.-S., Dusheiko, G. M., Janssen, H. L. A., Lau, D. T. Y.,  
1049 Locarnini, S. A., Peters, M. G., & Lai, C.-L. (2018). Hepatitis B virus infection.  
1050 *Nature Reviews. Disease Primers*, 4, 18035. <https://doi.org/10.1038/nrdp.2018.35>  
1051  
1052

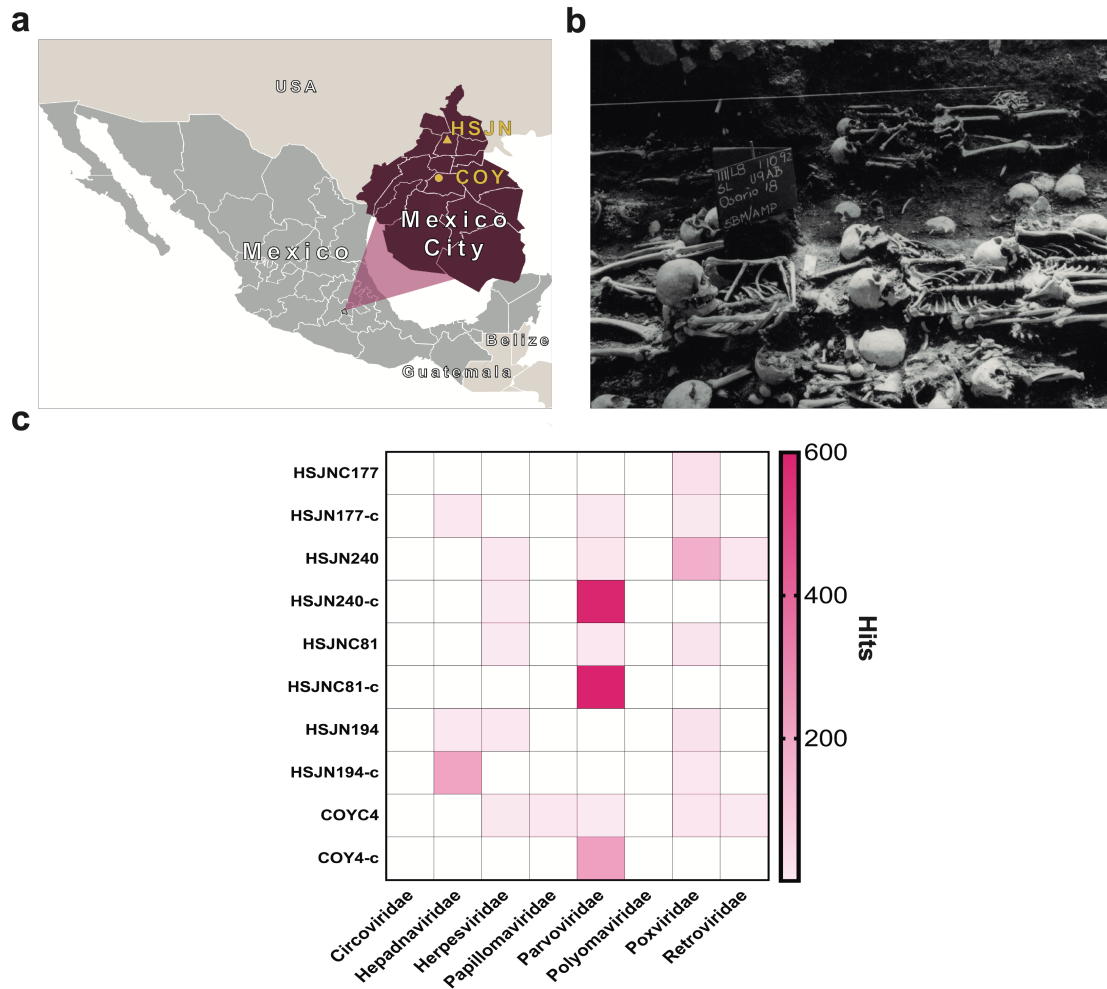

1053

1054 **Figure 1. Metagenomic analysis of Colonial individuals reveal HBV-like and**

1055 **B19V-like hits. a)** Location of the archeological sites used in this study, HSJN

1056 (19.431704, -99.141740) is shown as a yellow triangle and COY (19.347079, -

1057 99.159017) as a yellow circle, lines in pink map show current division of Mexico City.

1058 **b)** Several individuals discovered in massive burials archaeologically associated

1059 with the HSJN and colonial epidemics (photo courtesy of “Secretaria de Cultura

1060 INAH, SINAFO, Fototeca DSA”). **c)** Metagenomic analysis performed with MALT

1061 0.4.0 based on the Viral NCBI RefSeq. Viral abundancies were compared and

1062 normalized automatically in MEGAN between shotgun (*sample\_name*) and capture

1063 (*sample\_name-c*) NGS data. Only HBV or B19V positive samples are shown (all  
1064 samples analyzed are shown in Supplementary Figure 2a-b). A capture negative  
1065 control (HSJN177) is shown.  
1066



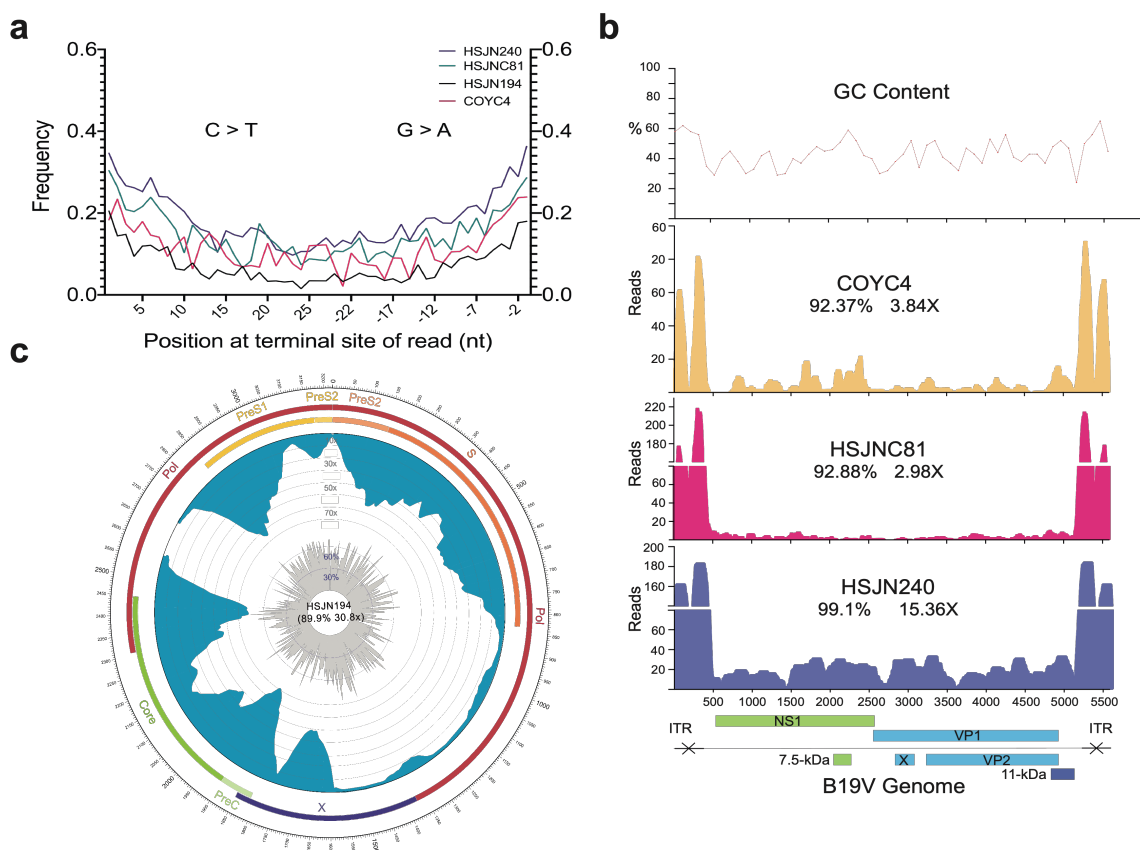

1067

1068 **Figure 2. Ancient B19V and HBV ancient genomes.** a) Superimposed damage  
 1069 patterns of ancient HBV (HSJN194) and B19V (HSJNC81, HSJN240, COYC4), X  
 1070 axis shows the position (nt) on the 5' (left) and 3' (right) end of the read, Y axis shows  
 1071 the damage frequency (raw individual damage patterns are shown on  
 1072 Supplementary Figure 3). b) B19V ssDNA linear genome, X axis shows position (nt)  
 1073 based on the reference genome (AB550331), and Y axis shows depth (as number  
 1074 of reads), GC content is shown as a percentage of each 100 bp windows, coverage  
 1075 and average depth for the CDS are shown under each individual ID. Schematic of  
 1076 the B19V genome is shown at the bottom. Highly covered regions correspond to  
 1077 dsDNA ITRs shown as crossed arrows. c) HBV circular genome, outer numbers  
 1078 show position (nt) based on reference genome (GQ331046), outer bars show genes



1079 with names, blue bars represent coverage and gray bars shows GC content each 10  
1080 bp windows. Coverage and average depth are shown in the center. Low covered  
1081 region between S and X overlaps with ssDNA region.  
1082

1083

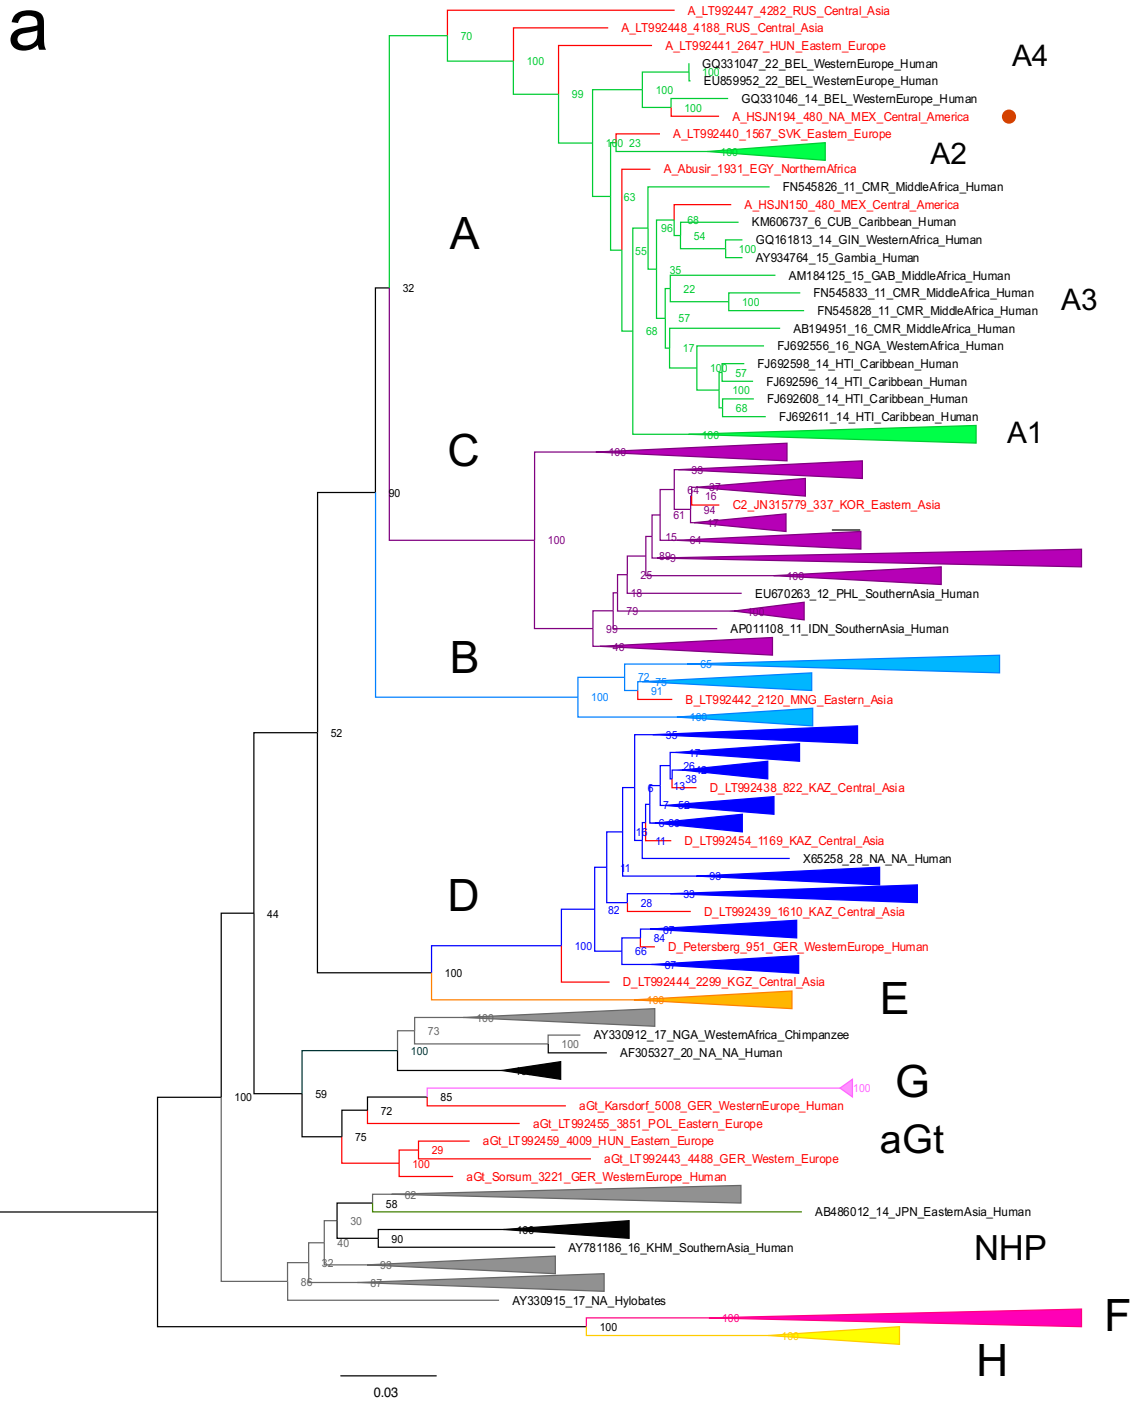

1084

1085

**b**

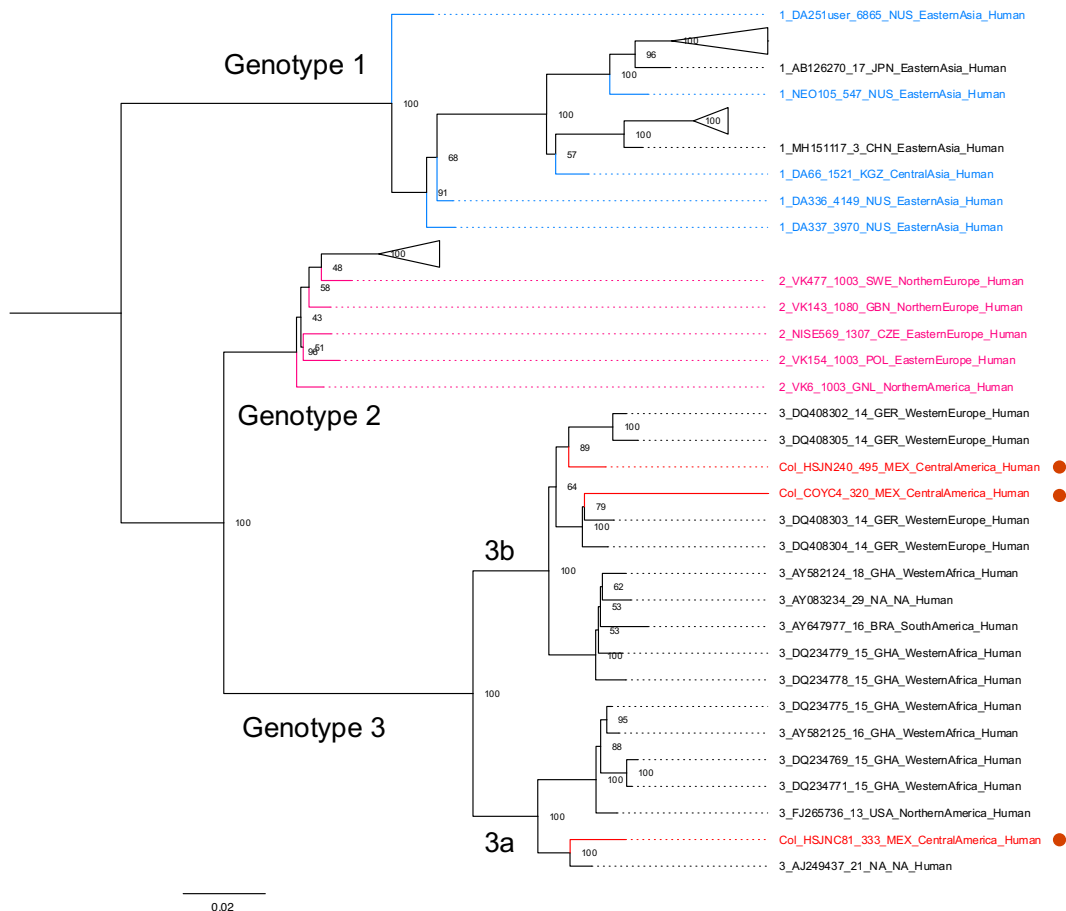

1086

1087 **Figure 3. Viral Colonial genomes are similar to modern African genetic**

1088 **diversity. a-b.** Maximum likelihood trees performed on RAxML 8.2.10 (1000

1089 bootstraps) with a midpoint root, genotypes are named in bold letters and sub-

1090 genotypes in italics. Bootstrap values are shown at the node center and triangles

1091 represent collapsed sequences from other genotypes. Sequences are named as

1092 follows: `genotype_ID_sampling.year_country.of.origin_area.of.origin_host.`

1093 Sequences from this study are highlighted with a red circle on the right. **a)** Based on

1094 the HBV whole genome, genotypes are named with letters and each is colored

1095 differently, while ancient sequences are shown in red. NHP: non-human primates;  
1096 **b)** based on B19V CDS where genotypes are named with numbers, and only ancient  
1097 genomes are colored.  
1098

**a**

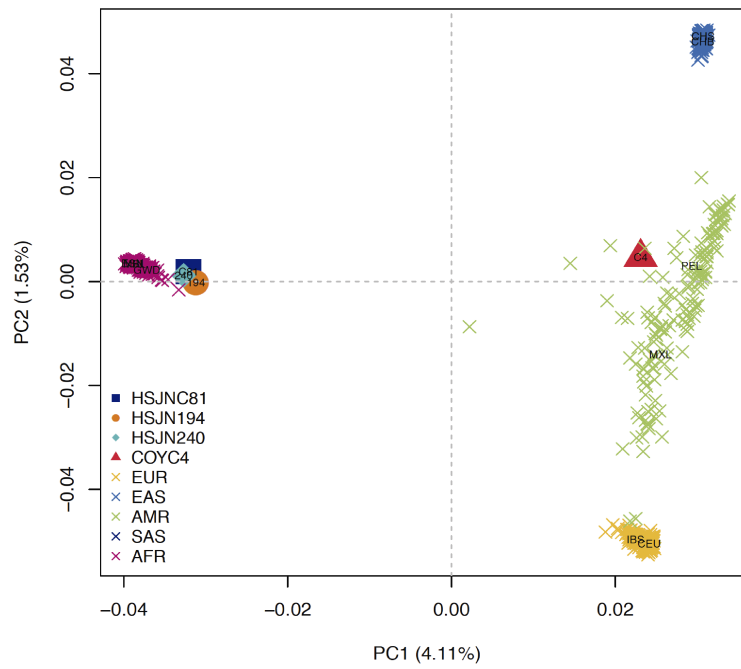

**b**

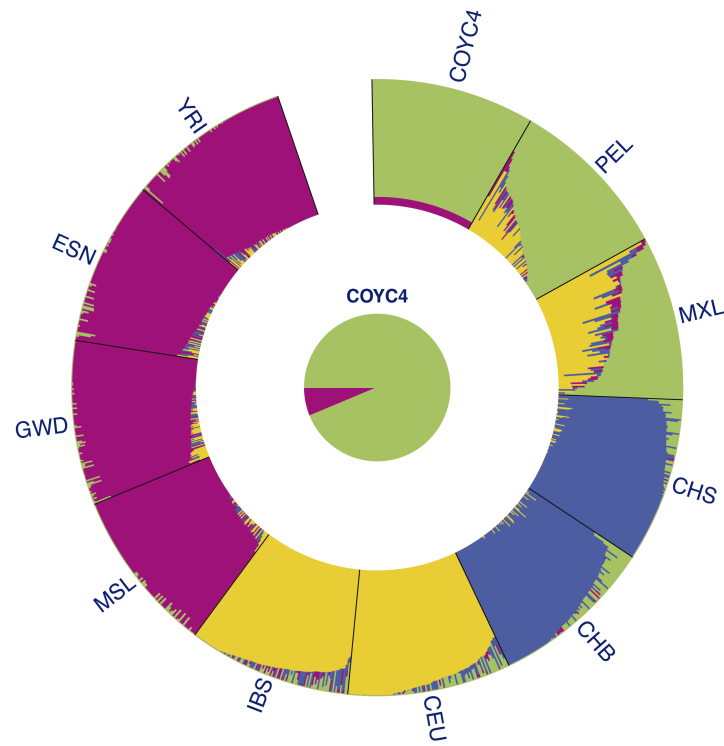

1100 **Figure 4. Human hosts are similar to modern African genetic diversity. a)** PCA  
1101 showing genetic affinities of ancient human hosts compared to the 1000 Genomes  
1102 Project reference panel. Crosses (X) show individuals from the reference panel while  
1103 other shapes show human hosts from which ancient HBV (HSJN194) and B19V  
1104 (HSJNC81, HSJN240, COYC4) sequences were recovered. Clusters are colored in  
1105 five super populations EUR: Europeans (IBS, CEU); EAS: East Asian (CHB); AMR:  
1106 Ad Mixed Americans (MXL, PEL); SAS: South Asians (CHS) and AFR: Africans (YRI,  
1107 ESN, GWD, MSL). Three letter code is based on the 1000 Genomes Project  
1108 nomenclature. **b)** Admixture analysis with COYC4 intersected sites with 1000  
1109 Genomes MEGA array, run with k=4 for 100 replicates. Each color shows a different  
1110 component using the same colors as in the PCA. In the center a pie chart shows the  
1111 proportion of native American (green) and African (magenta) genetic components.
